# Supplementary material for: Reinvestigation of Aminoacyl-TRNA Synthetase Core Complex by Affinity Purification-Mass Spectrometry Reveals TARSL2 as a Potential Member of the Complex
Source: PubMed Central journal article supplement (PMC3846882; doi:10.1371/journal.pone.0081734), 2013-12-02
Supplement: pone.0081734.s001.pdf [file pone.0081734.s001.pdf]

**Figure S1. MS/MS spectra, scores and p-values for specific TARSL2 peptides.**

Among many spectra matched to TARSL2 peptides, one representative spectrum per each unique peptide is presented. **(A)** PeptideProphet probability, spectrum number, expect value in MASCOT search result, matched ions, peptide sequence, accession number in IPI database and calculated mass for 16 unique peptides are listed. Note that there were three protein entries in IPI database corresponding to TARSL2. Note that the peptides shared with TARS are not shown. **(B)** MS/MS spectra representing TARSL2.

**A**

| prob   | spectrum                | expect | ions  | peptide                                | protein        | calc_mass |
|--------|-------------------------|--------|-------|----------------------------------------|----------------|-----------|
| 0.9986 | Set1_K_2.02703.02703.2  | 0      | 11/24 | R.VADGQTVQGEVWK.T                      | IPI00328082 +2 | 1415.7123 |
| 0.9985 | Set1_K_2.03786.03786.2  | 0      | 10/32 | K.NSSTYWEGNPEMETLQR.I                  | IPI00328082 +2 | 2040.8925 |
| 0.9983 | Set1_K_1.03856.03856.2  | 0      | 18/22 | R.MIAILSENYGCK.W                       | IPI00328082 +2 | 1294.6669 |
| 0.9901 | Set2_A1_2.03782.03782.2 | 0      | 12/28 | R.AVSSTELSALENIC <sub>160.03</sub> K.A | IPI00328082 +1 | 1620.8107 |
| 0.9775 | Set2_K_2.05982.05982.2  | 0.0002 | 10/24 | R.GAFIYNTLTFIR.E                       | IPI00328082 +2 | 1529.7957 |
| 0.9789 | Set3_K_1.01752.01752.2  | 0.0001 | 07/20 | K.KGDTSNITIVR.V                        | IPI00328082 +2 | 1202.6697 |
| 0.9798 | Set1_A2_2.02298.02298.2 | 0      | 09/22 | K.M <sub>147.04</sub> NPGDGAFYGPCK.I   | IPI00328082 +2 | 1268.5574 |
| 0.9834 | Set2_K_2.01050.01050.2  | 0.0001 | 09/18 | K.VNTATTTVYR.C                         | IPI00328082 +2 | 1124.5904 |
| 0.9919 | Set1_K_2.05070.05070.2  | 0      | 11/26 | K.QLQNSLMDFGEPWK.M                     | IPI00328082 +2 | 1691.8056 |
| 0.9668 | Set3_A2_1.03067.03067.2 | 0.0003 | 09/22 | R.NELSGTSLGLTR.V                       | IPI00328082 +2 | 1246.6595 |
| 0.9879 | Set1_A1_1.03515.03515.2 | 0      | 13/18 | R.IYGISFPDNK.M                         | IPI00328082 +2 | 1152.5893 |
| 0.9815 | Set3_K_1.06120.06120.2  | 0.0001 | 15/42 | K.TTPYQVAEISQELAEETVIK.V               | IPI00328082 +2 | 2348.2189 |
| 0.9627 | Set1_A1_1.03295.03295.2 | 0.0004 | 16/26 | R.DFTEVLSPNM <sub>147.04</sub> YNSK.L  | IPI00328082 +2 | 1659.7529 |
| 0.9785 | Set3_K_1.03255.03255.2  | 0.0001 | 08/16 | R.FADFGVLHR.N                          | IPI00328082 +2 | 1060.5533 |
| 0.9597 | Set3_K_1.03278.03278.2  | 0.0005 | 10/24 | R.QVMVIPVGPCTC <sub>160.03</sub> EK.Y  | IPI00328082 +2 | 1456.7496 |
| 0.6797 | Set3_K_1.00265.00265.2  | 0.0001 | 08/20 | K.MKESEADSEVK.H                        | IPI00328082 +2 | 1251.5731 |

B

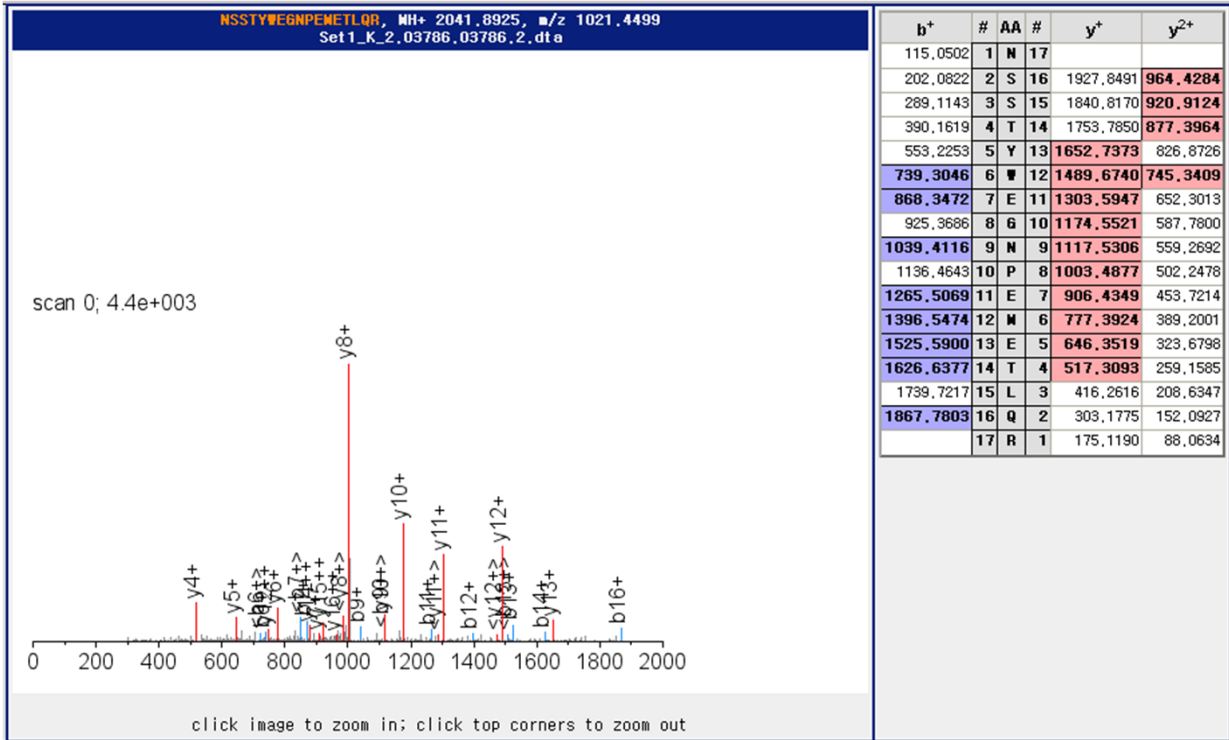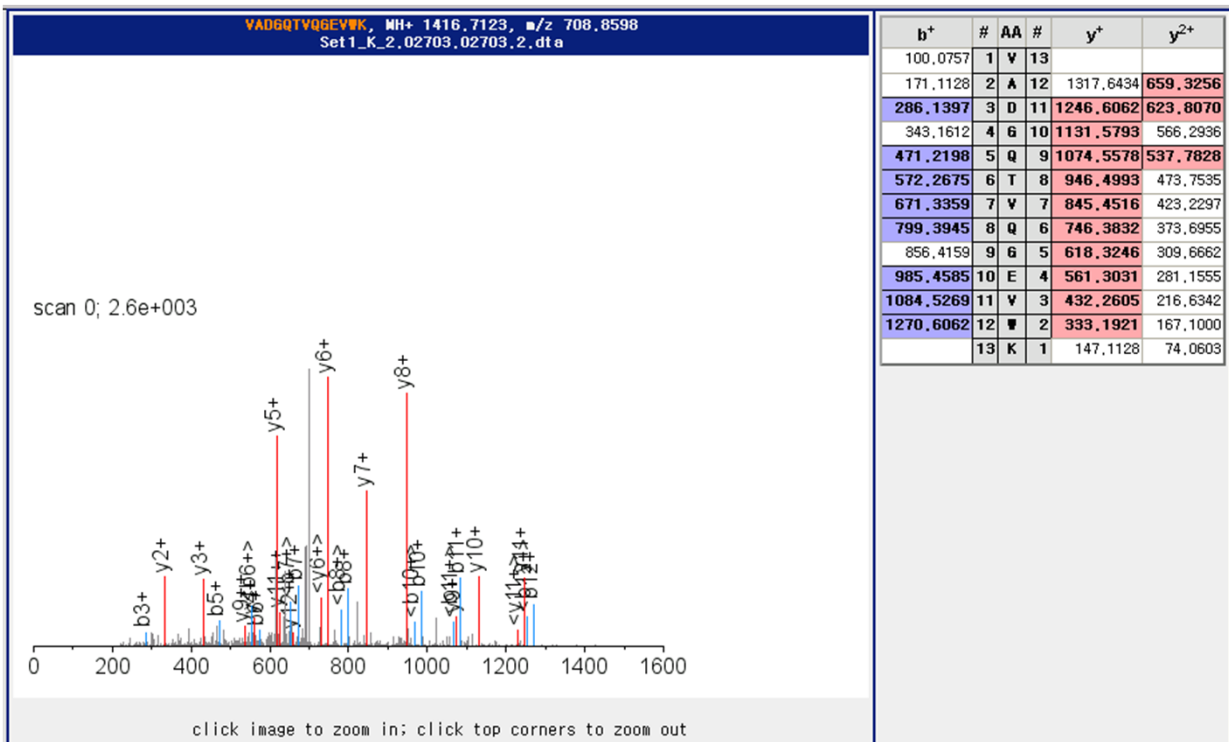

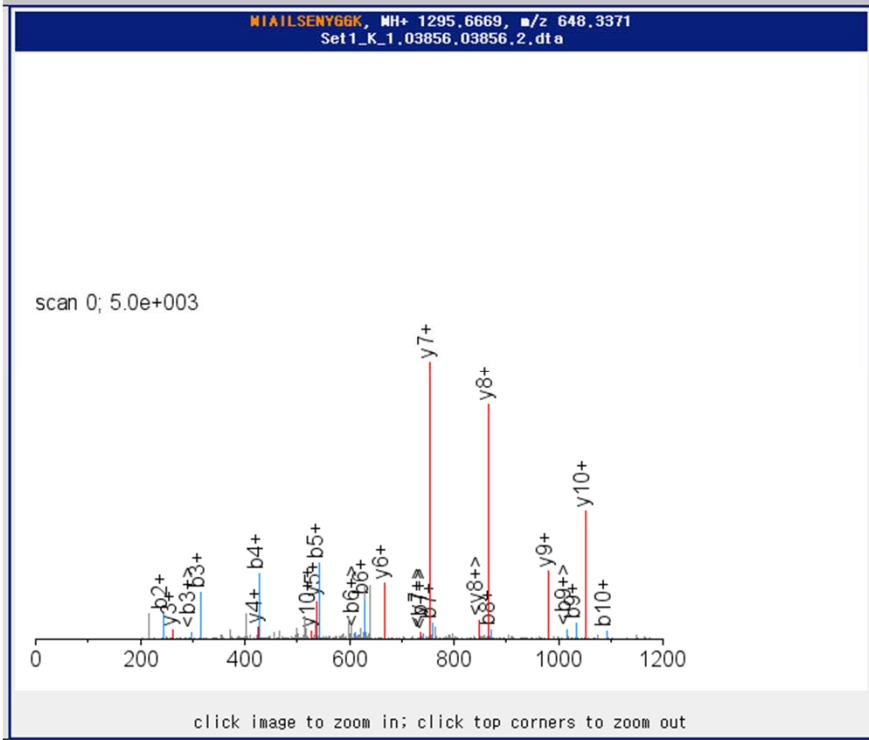

| b <sup>+</sup> | #  | AA | #  | y <sup>+</sup> | y <sup>2+</sup> |
|----------------|----|----|----|----------------|-----------------|
| 132,0478       | 1  | M  | 12 |                |                 |
| 245,1318       | 2  | I  | 11 | 1164,6259      | 582,8169        |
| 316,1689       | 3  | A  | 10 | 1051,5419      | 526,2748        |
| 429,2530       | 4  | I  | 9  | 980,5047       | 490,7563        |
| 542,3371       | 5  | L  | 8  | 867,4207       | 434,2142        |
| 629,3691       | 6  | S  | 7  | 754,3366       | 377,6722        |
| 758,4117       | 7  | E  | 6  | 667,3046       | 334,1562        |
| 872,4546       | 8  | N  | 5  | 538,2620       | 269,6349        |
| 1035,5179      | 9  | Y  | 4  | 424,2191       | 212,6134        |
| 1092,5394      | 10 | G  | 3  | 261,1557       | 131,0818        |
| 1149,5609      | 11 | G  | 2  | 204,1343       | 102,5710        |
|                | 12 | K  | 1  | 147,1128       | 74,0603         |

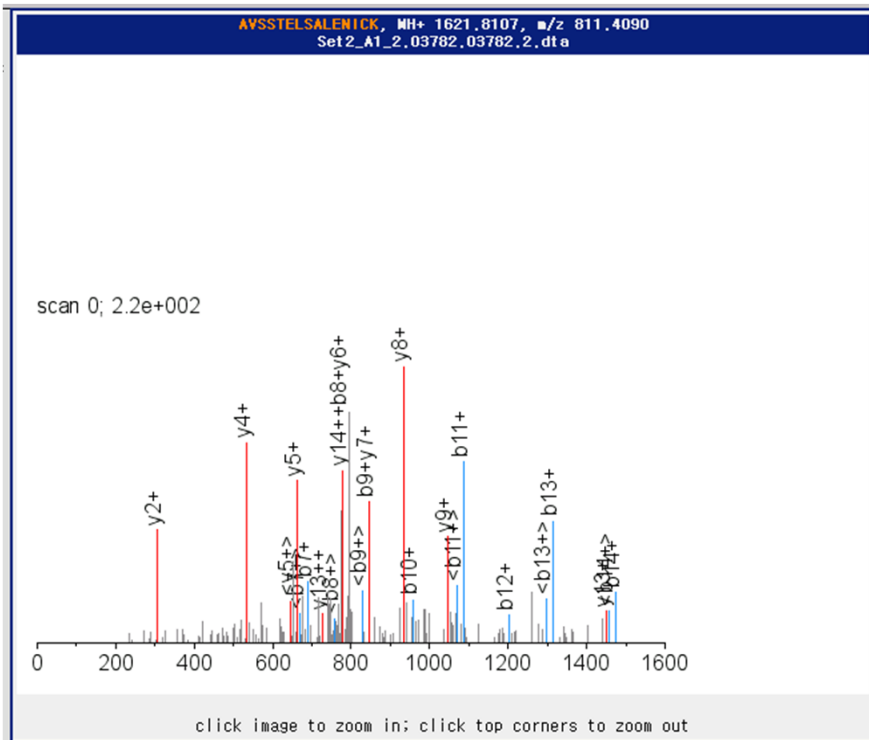

| b <sup>+</sup> | #  | AA | #  | y <sup>+</sup> | y <sup>2+</sup> |
|----------------|----|----|----|----------------|-----------------|
| 72,0444        | 1  | A  | 15 |                |                 |
| 171,1128       | 2  | V  | 14 | 1550,7731      | 775,8904        |
| 258,1448       | 3  | S  | 13 | 1451,7046      | 726,3562        |
| 345,1769       | 4  | S  | 12 | 1364,6726      | 682,8402        |
| 446,2245       | 5  | T  | 11 | 1277,6406      | 639,3242        |
| 575,2671       | 6  | E  | 10 | 1176,5929      | 588,8004        |
| 688,3512       | 7  | L  | 9  | 1047,5503      | 524,2791        |
| 775,3832       | 8  | S  | 8  | 934,4662       | 467,7370        |
| 846,4203       | 9  | A  | 7  | 847,4342       | 424,2210        |
| 959,5044       | 10 | L  | 6  | 776,3971       | 388,7025        |
| 1088,5470      | 11 | E  | 5  | 663,3130       | 332,1604        |
| 1202,5899      | 12 | N  | 4  | 534,2704       | 267,6391        |
| 1315,6740      | 13 | I  | 3  | 420,2275       | 210,6177        |
| 1475,7046      | 14 | C  | 2  | 307,1435       | 154,0756        |
|                | 15 | K  | 1  | 147,1128       | 74,0603         |

C(14):+160,03

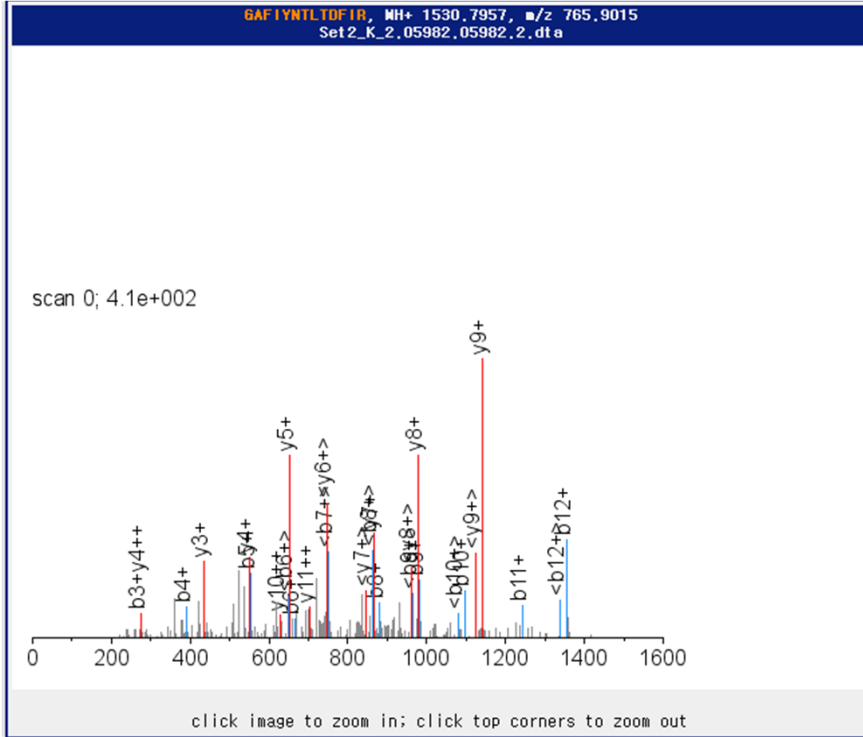

| b <sup>+</sup>   | #  | AA # | y <sup>+</sup>   | y <sup>2+</sup> |
|------------------|----|------|------------------|-----------------|
| 58,0287          | 1  | G 13 |                  |                 |
| 129,0659         | 2  | A 12 | 1473,7736        | 737,3907        |
| <b>276,1343</b>  | 3  | F 11 | 1402,7365        | <b>701,8722</b> |
| <b>389,2183</b>  | 4  | I 10 | 1255,6681        | <b>628,3380</b> |
| 552,2817         | 5  | Y 9  | <b>1142,5841</b> | 571,7959        |
| <b>666,3246</b>  | 6  | N 8  | <b>979,5207</b>  | 490,2643        |
| 767,3723         | 7  | T 7  | <b>865,4778</b>  | 433,2428        |
| <b>880,4563</b>  | 8  | L 6  | 764,4301         | 382,7190        |
| <b>981,5040</b>  | 9  | T 5  | <b>651,3461</b>  | 326,1769        |
| <b>1096,5310</b> | 10 | D 4  | <b>550,2984</b>  | <b>275,6531</b> |
| <b>1243,5994</b> | 11 | F 3  | <b>435,2714</b>  | 218,1396        |
| <b>1356,6834</b> | 12 | I 2  | 288,2030         | 144,6054        |
|                  | 13 | R 1  | 175,1190         | 88,0634         |

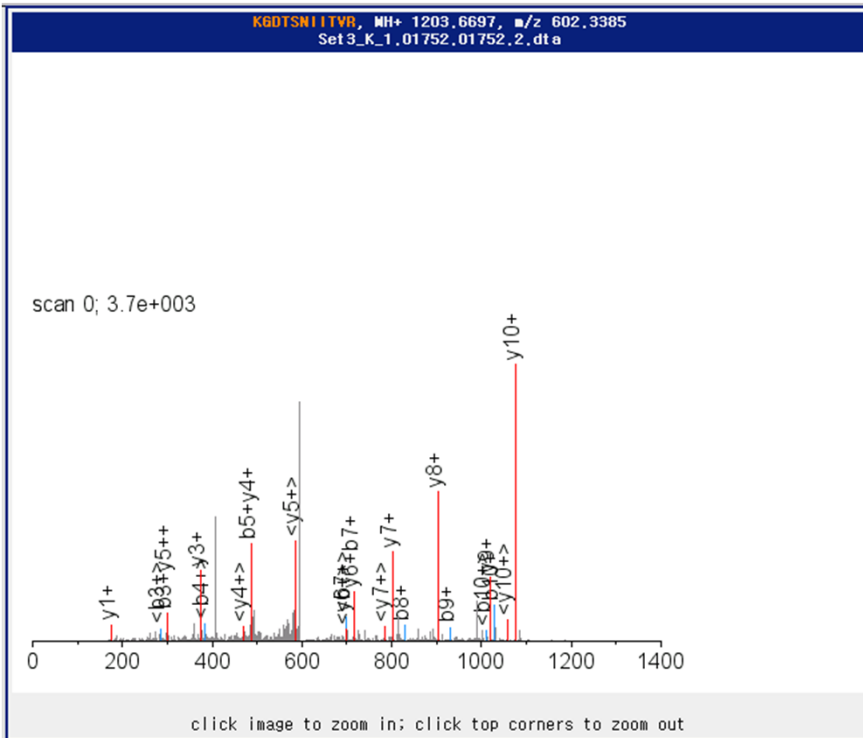

| b <sup>+</sup>   | #  | AA # | y <sup>+</sup>   | y <sup>2+</sup> |
|------------------|----|------|------------------|-----------------|
| 129,1022         | 1  | K 11 |                  |                 |
| 186,1237         | 2  | G 10 | <b>1075,5742</b> | 538,2910        |
| <b>301,1506</b>  | 3  | D 9  | <b>1018,5528</b> | 509,7803        |
| 402,1983         | 4  | T 8  | <b>903,5258</b>  | 452,2668        |
| <b>489,2304</b>  | 5  | S 7  | <b>802,4781</b>  | 401,7430        |
| 603,2733         | 6  | N 6  | <b>715,4461</b>  | 358,2270        |
| <b>716,3573</b>  | 7  | I 5  | 601,4032         | <b>301,2055</b> |
| <b>829,4414</b>  | 8  | I 4  | <b>488,3191</b>  | 244,6635        |
| <b>930,4891</b>  | 9  | T 3  | <b>375,2350</b>  | 188,1214        |
| <b>1029,5575</b> | 10 | V 2  | 274,1874         | 137,5976        |
|                  | 11 | R 1  | <b>175,1190</b>  | 88,0634         |

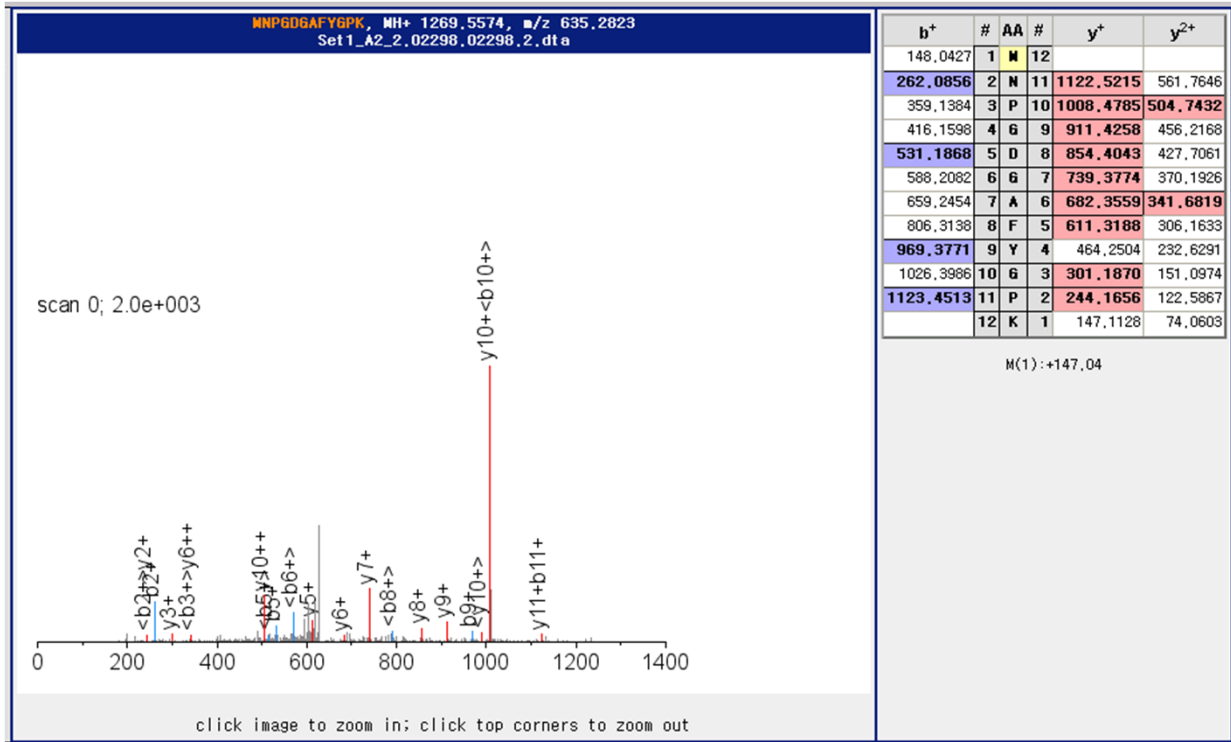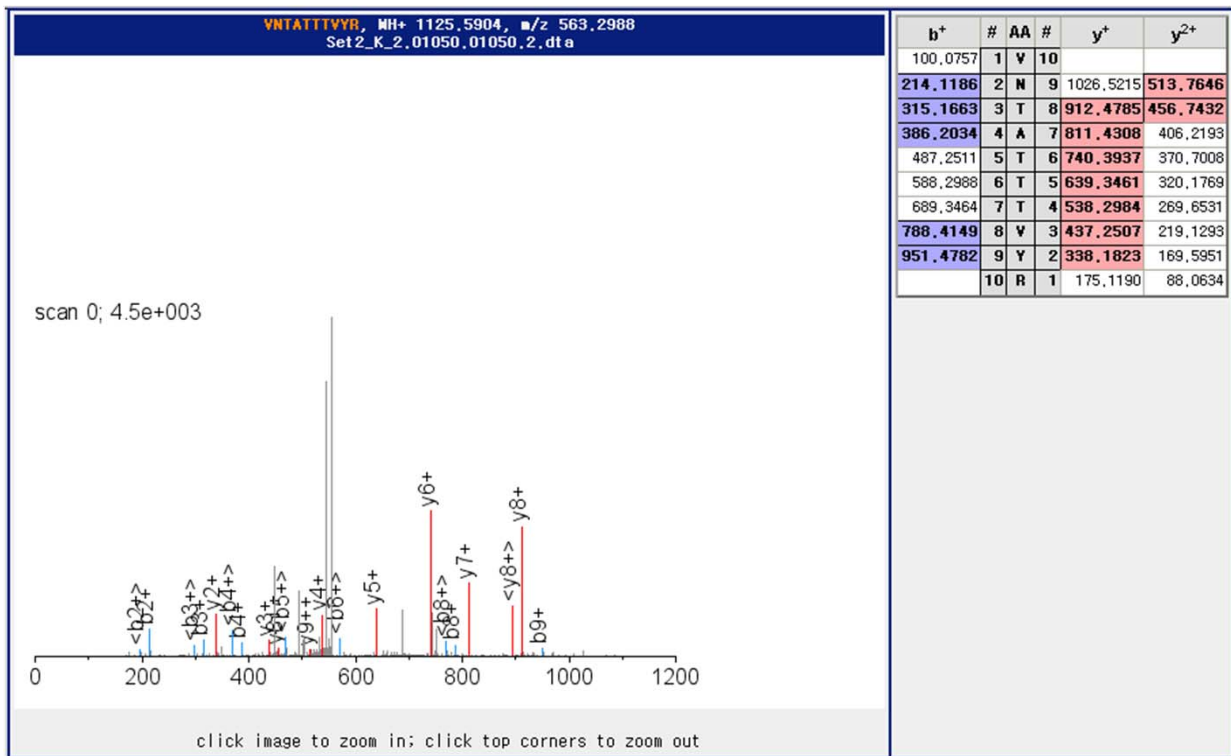

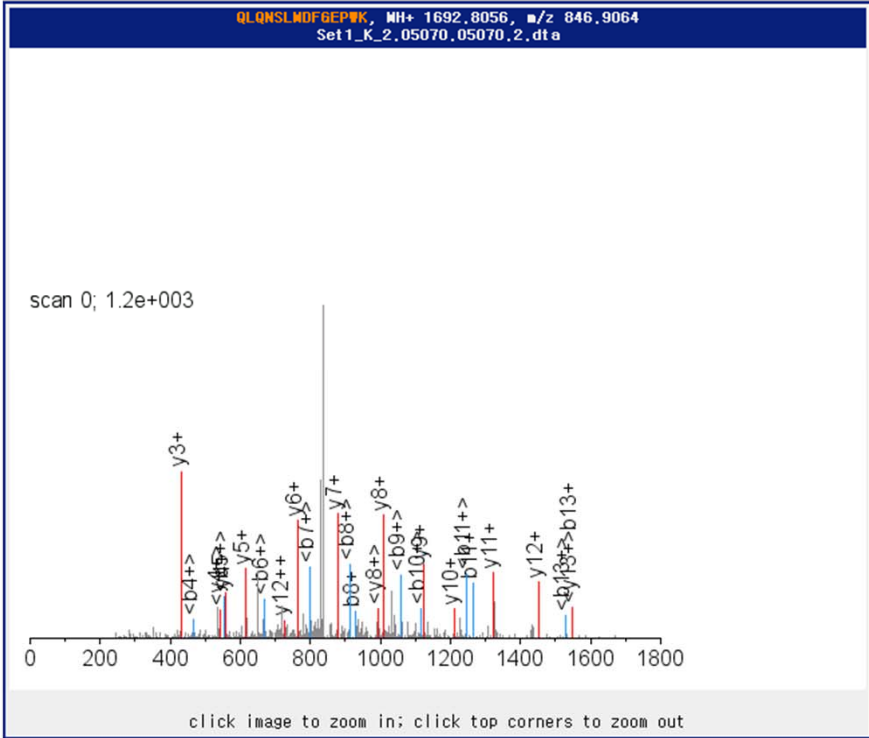

| b <sup>+</sup> | #  | AA # | y <sup>+</sup> | y <sup>2+</sup> |
|----------------|----|------|----------------|-----------------|
| 129,0659       | 1  | Q 14 |                |                 |
| 242,1499       | 2  | L 13 | 1564,7464      | 782,8771        |
| 370,2085       | 3  | Q 12 | 1451,6624      | 726,3351        |
| 484,2514       | 4  | N 11 | 1323,6038      | 662,3058        |
| 571,2835       | 5  | S 10 | 1209,5609      | 605,2843        |
| 684,3675       | 6  | L 9  | 1122,5288      | 561,7683        |
| 815,4080       | 7  | M 8  | 1009,4448      | 505,2263        |
| 930,4349       | 8  | D 7  | 878,4043       | 439,7061        |
| 1077,5034      | 9  | F 6  | 763,3774       | 382,1926        |
| 1134,5248      | 10 | G 5  | 616,3089       | 308,6584        |
| 1263,5674      | 11 | E 4  | 559,2875       | 280,1476        |
| 1360,6202      | 12 | P 3  | 430,2449       | 215,6264        |
| 1546,6995      | 13 | W 2  | 333,1921       | 167,1000        |
|                | 14 | K 1  | 147,1128       | 74,0603         |

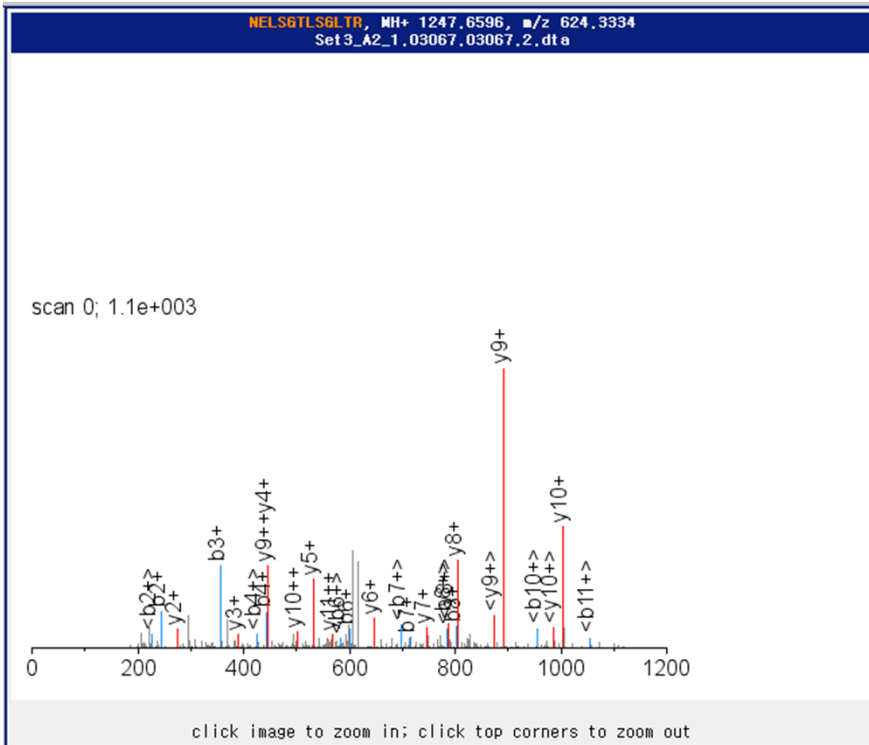

| b <sup>+</sup> | #  | AA # | y <sup>+</sup> | y <sup>2+</sup> |
|----------------|----|------|----------------|-----------------|
| 115,0502       | 1  | N 12 |                |                 |
| 244,0928       | 2  | E 11 | 1133,6161      | 567,3120        |
| 357,1769       | 3  | L 10 | 1004,5735      | 502,7907        |
| 444,2089       | 4  | S 9  | 891,4894       | 446,2486        |
| 501,2304       | 5  | G 8  | 804,4574       | 402,7326        |
| 602,2780       | 6  | T 7  | 747,4359       | 374,2219        |
| 715,3621       | 7  | L 6  | 646,3883       | 323,6980        |
| 802,3941       | 8  | S 5  | 533,3042       | 267,1560        |
| 859,4156       | 9  | G 4  | 446,2722       | 223,6400        |
| 972,4997       | 10 | L 3  | 389,2507       | 195,1293        |
| 1073,5473      | 11 | T 2  | 276,1666       | 138,5872        |
|                | 12 | R 1  | 175,1190       | 88,0634         |

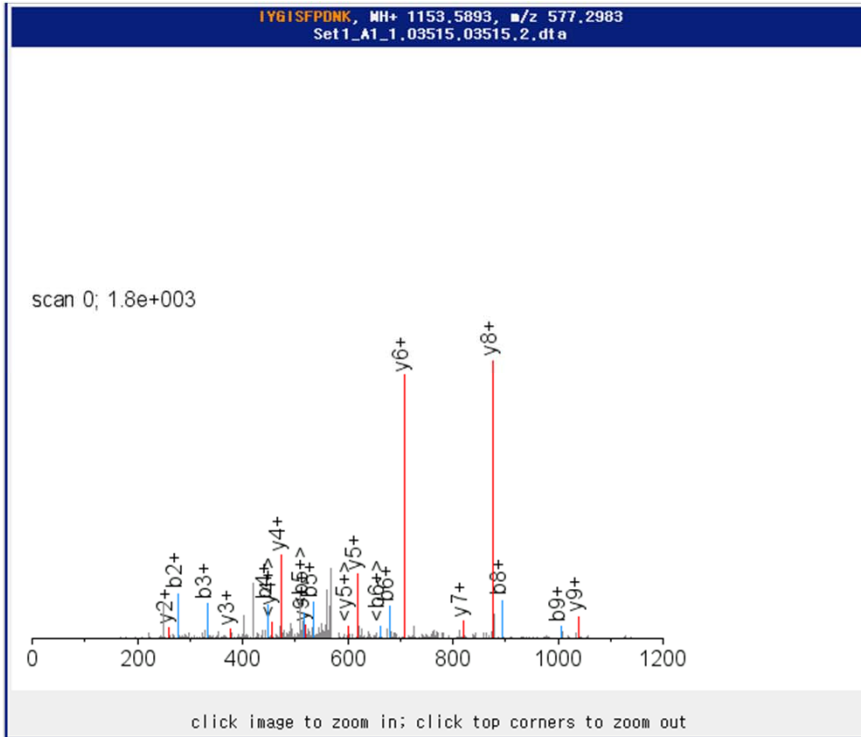

| b <sup>+</sup> | #  | AA | #  | y <sup>+</sup> | y <sup>2+</sup> |
|----------------|----|----|----|----------------|-----------------|
| 114,0913       | 1  | I  | 10 |                |                 |
| 277,1547       | 2  | Y  | 9  | 1040,5047      | 520,7563        |
| 334,1761       | 3  | G  | 8  | 877,4414       | 439,2246        |
| 447,2602       | 4  | I  | 7  | 820,4199       | 410,7139        |
| 534,2922       | 5  | S  | 6  | 707,3359       | 354,1719        |
| 681,3606       | 6  | F  | 5  | 620,3039       | 310,6558        |
| 778,4134       | 7  | P  | 4  | 473,2354       | 237,1216        |
| 893,4403       | 8  | D  | 3  | 376,1827       | 188,5952        |
| 1007,4833      | 9  | N  | 2  | 261,1557       | 131,0818        |
|                | 10 | K  | 1  | 147,1128       | 74,0603         |

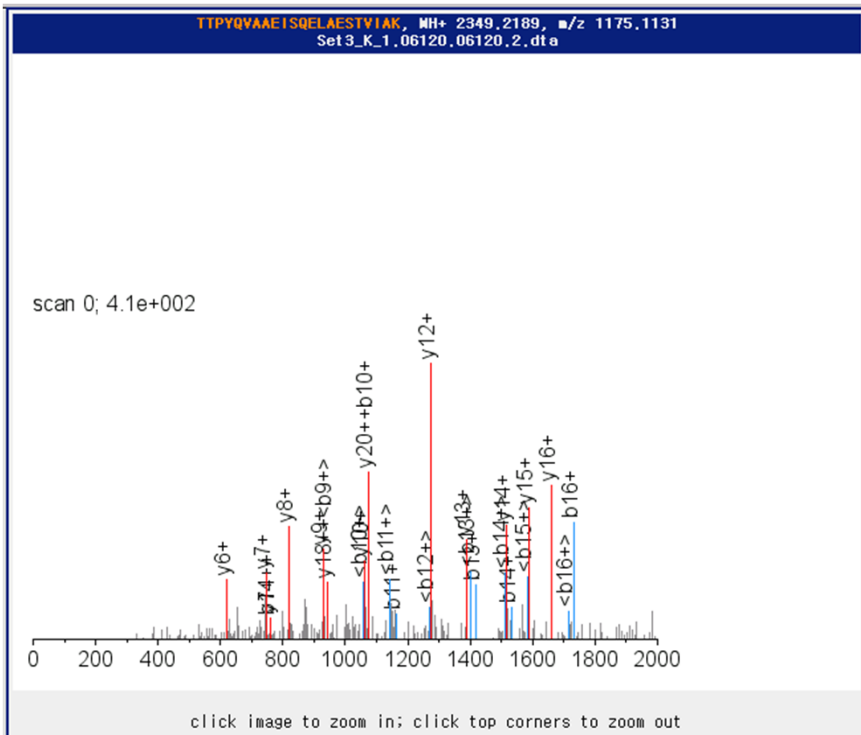

| b <sup>+</sup> | #  | AA | #  | y <sup>+</sup> | y <sup>2+</sup> |
|----------------|----|----|----|----------------|-----------------|
| 102,0550       | 1  | T  | 22 |                |                 |
| 203,1026       | 2  | T  | 21 | 2248,1707      | 1124,5893       |
| 300,1554       | 3  | P  | 20 | 2147,1230      | 1074,0654       |
| 463,2187       | 4  | Y  | 19 | 2050,0703      | 1025,5391       |
| 591,2773       | 5  | Q  | 18 | 1887,0069      | 944,0074        |
| 690,3457       | 6  | V  | 17 | 1758,9484      | 879,9781        |
| 761,3828       | 7  | A  | 16 | 1659,8800      | 830,4439        |
| 832,4199       | 8  | A  | 15 | 1588,8428      | 794,9253        |
| 961,4625       | 9  | E  | 14 | 1517,8057      | 759,4068        |
| 1074,5466      | 10 | I  | 13 | 1388,7631      | 694,8855        |
| 1161,5786      | 11 | S  | 12 | 1275,6791      | 638,3434        |
| 1289,6372      | 12 | Q  | 11 | 1188,6470      | 594,8274        |
| 1418,6798      | 13 | E  | 10 | 1060,5885      | 530,7981        |
| 1531,7639      | 14 | L  | 9  | 931,5459       | 466,2768        |
| 1602,8010      | 15 | A  | 8  | 818,4618       | 409,7348        |
| 1731,8436      | 16 | E  | 7  | 747,4247       | 374,2163        |
| 1818,8756      | 17 | S  | 6  | 618,3821       | 309,6950        |
| 1919,9233      | 18 | T  | 5  | 531,3501       | 266,1789        |
| 2018,9917      | 19 | V  | 4  | 430,3024       | 215,6551        |
| 2132,0758      | 20 | I  | 3  | 331,2340       | 166,1209        |
| 2203,1129      | 21 | A  | 2  | 218,1499       | 109,5789        |
|                | 22 | K  | 1  | 147,1128       | 74,0603         |

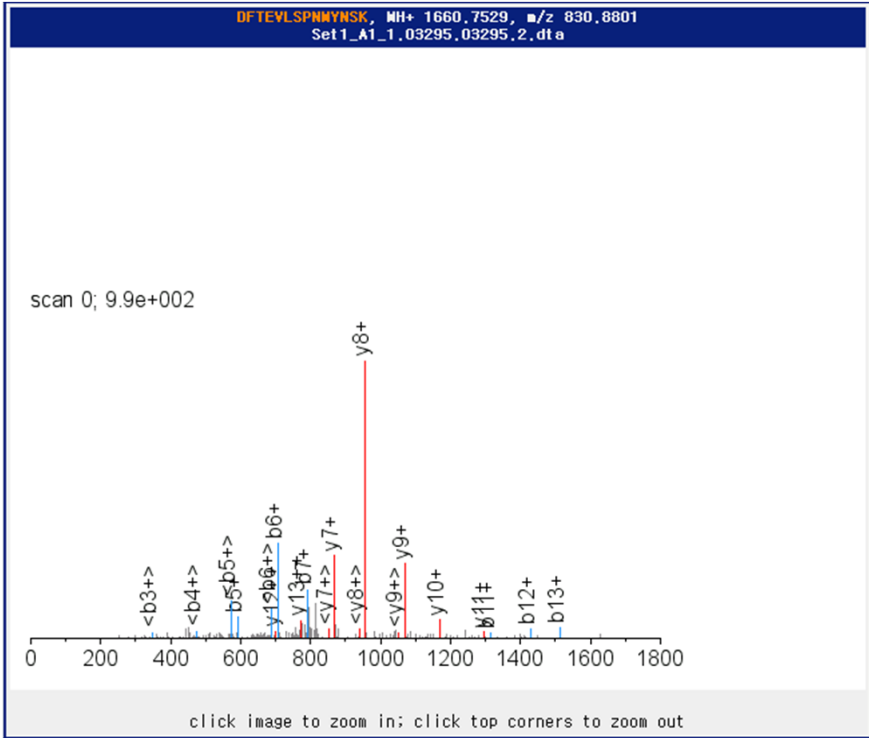

| b <sup>+</sup> | #  | AA # | y <sup>+</sup> | y <sup>2+</sup> |
|----------------|----|------|----------------|-----------------|
| 116,0342       | 1  | D 14 |                |                 |
| 263,1026       | 2  | F 13 | 1545,7254      | 773,3666        |
| 364,1503       | 3  | T 12 | 1398,6570      | 699,8324        |
| 493,1929       | 4  | E 11 | 1297,6093      | 649,3086        |
| 592,2613       | 5  | V 10 | 1168,5667      | 584,7873        |
| 705,3454       | 6  | L 9  | 1069,4983      | 535,2530        |
| 792,3774       | 7  | S 8  | 956,4142       | 478,7110        |
| 889,4302       | 8  | P 7  | 869,3822       | 435,1950        |
| 1003,4731      | 9  | N 6  | 772,3294       | 386,6686        |
| 1150,5085      | 10 | M 5  | 658,2865       | 329,6472        |
| 1313,5718      | 11 | Y 4  | 511,2511       | 256,1295        |
| 1427,6148      | 12 | N 3  | 348,1878       | 174,5978        |
| 1514,6468      | 13 | S 2  | 234,1448       | 117,5763        |
|                | 14 | K 1  | 147,1128       | 74,0603         |

M(10):+147.04

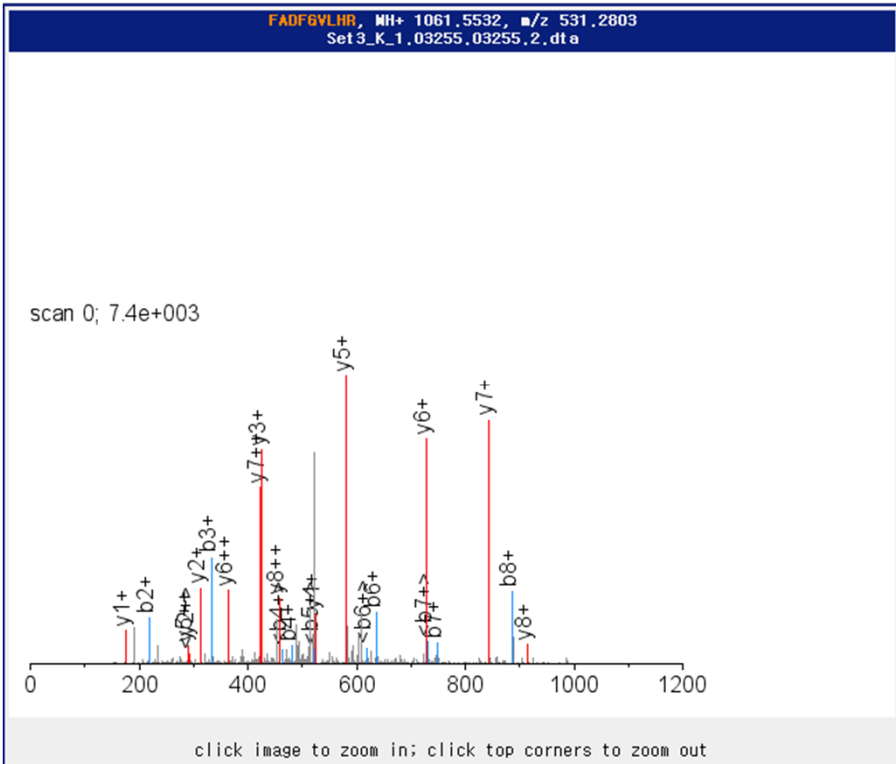

| b <sup>+</sup> | # | AA # | y <sup>+</sup> | y <sup>2+</sup> |
|----------------|---|------|----------------|-----------------|
| 148,0757       | 1 | F 9  |                |                 |
| 219,1128       | 2 | A 8  | 914,4843       | 457,7461        |
| 334,1397       | 3 | D 7  | 843,4472       | 422,2275        |
| 481,2082       | 4 | F 6  | 728,4202       | 364,7140        |
| 538,2296       | 5 | G 5  | 581,3518       | 291,1798        |
| 637,2980       | 6 | V 4  | 524,3303       | 262,6691        |
| 750,3821       | 7 | L 3  | 425,2619       | 213,1349        |
| 887,4410       | 8 | H 2  | 312,1779       | 156,5928        |
|                | 9 | R 1  | 175,1190       | 88,0634         |



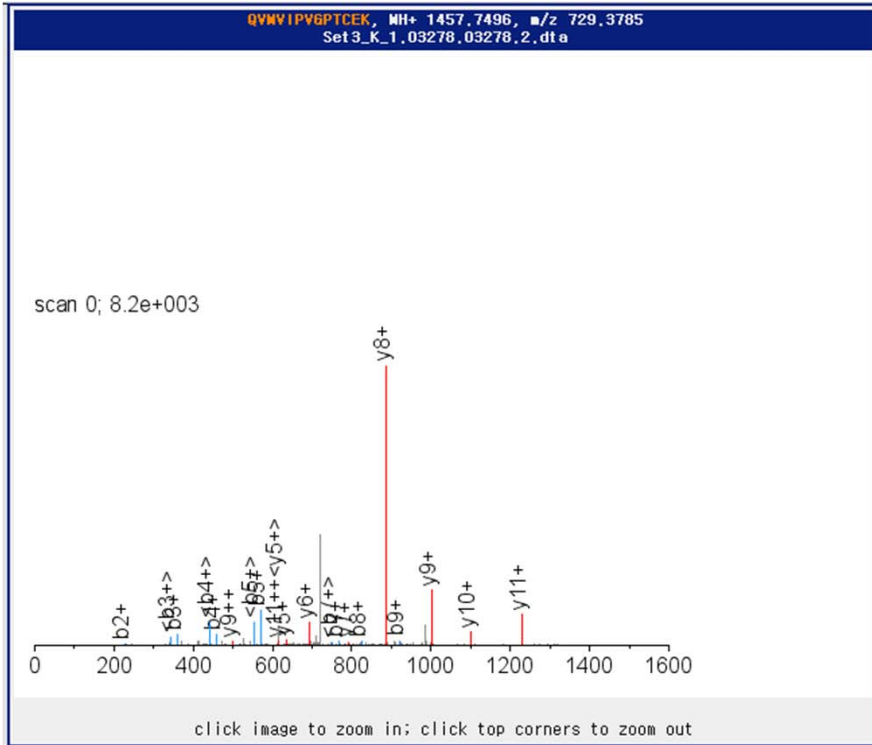

| b <sup>+</sup> | #  | AA # | y <sup>+</sup> | y <sup>2+</sup> |
|----------------|----|------|----------------|-----------------|
| 129,0659       | 1  | Q 13 |                |                 |
| 228,1343       | 2  | V 12 | 1329,6905      | 665,3492        |
| 359,1748       | 3  | M 11 | 1230,6221      | 615,8150        |
| 458,2432       | 4  | V 10 | 1099,5816      | 550,2947        |
| 571,3272       | 5  | I 9  | 1000,5132      | 500,7605        |
| 668,3800       | 6  | P 8  | 887,4291       | 444,2185        |
| 767,4484       | 7  | V 7  | 790,3764       | 395,6921        |
| 824,4699       | 8  | G 6  | 691,3080       | 346,1579        |
| 921,5226       | 9  | P 5  | 634,2865       | 317,6472        |
| 1022,5703      | 10 | T 4  | 537,2337       | 269,1208        |
| 1182,6010      | 11 | C 3  | 436,1860       | 218,5989        |
| 1311,6436      | 12 | E 2  | 276,1554       | 138,5816        |
|                | 13 | K 1  | 147,1128       | 74,0603         |

C(11):+160,03

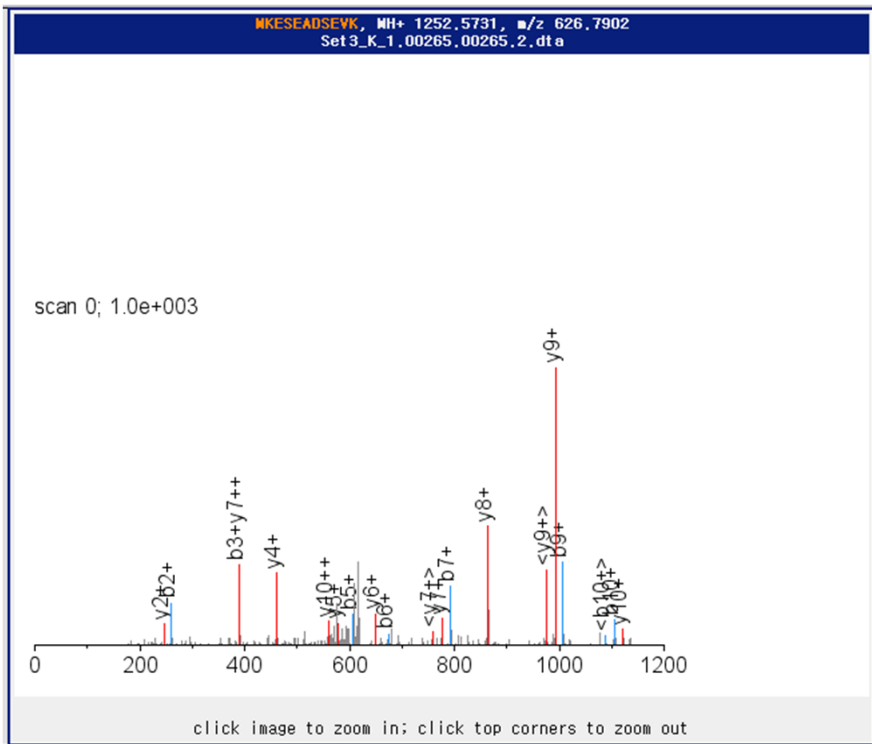

| b <sup>+</sup> | #  | AA # | y <sup>+</sup> | y <sup>2+</sup> |
|----------------|----|------|----------------|-----------------|
| 132,0478       | 1  | M 11 |                |                 |
| 260,1427       | 2  | K 10 | 1121,5321      | 561,2699        |
| 389,1853       | 3  | E 9  | 993,4371       | 497,2225        |
| 476,2173       | 4  | S 8  | 864,3945       | 432,7012        |
| 605,2599       | 5  | E 7  | 777,3625       | 389,1852        |
| 676,2971       | 6  | A 6  | 648,3199       | 324,6639        |
| 791,3240       | 7  | D 5  | 577,2828       | 289,1453        |
| 878,3560       | 8  | S 4  | 462,2558       | 231,6318        |
| 1007,3986      | 9  | E 3  | 375,2238       | 188,1158        |
| 1106,4670      | 10 | V 2  | 246,1812       | 123,5945        |
|                | 11 | K 1  | 147,1128       | 74,0603         |
