# Supplementary material for: Reinvestigation of Aminoacyl-TRNA Synthetase Core Complex by Affinity Purification-Mass Spectrometry Reveals TARSL2 as a Potential Member of the Complex
Source: PubMed Central journal article supplement (PMC3846882; doi:10.1371/journal.pone.0081734), 2013-12-02
Supplement: pone.0081734.s002.pdf [file pone.0081734.s002.pdf]

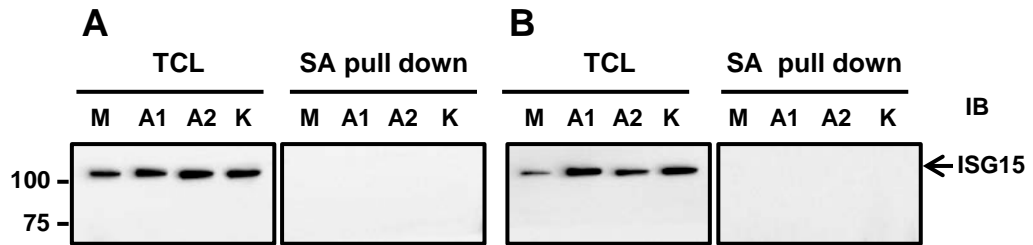

**Figure S2. Detection of ISGylated TARS in HEK 293T and HCT-8 cells.**

(A, B) ISGylated TARS was not detected in AIMP1, AIMP2 and KARS immunoprecipitates of HEK 293T (A) and HCT-8 cells (B). TCL; total cell lysate, SA pull down; streptavidin pull down.
