# Supplementary material for: Reinvestigation of Aminoacyl-TRNA Synthetase Core Complex by Affinity Purification-Mass Spectrometry Reveals TARSL2 as a Potential Member of the Complex
Source: PLoS One. 2013 Dec 2;8(12):e81734. doi: 10.1371/journal.pone.0081734 (PMC3846882; doi:10.1371/journal.pone.0081734)
Supplement: Table S1 — (A) Identified proteins from AIMP1 precipitated in HEK293T cells and their SAINT scores. (B) Identified proteins from AIMP2 precipitated in HEK293T cells and their SAINT scores. (C) Identified proteins from KARS precipitated in HEK293T cells and their SAINT scores. (XLSX) [file pone.0081734.s006.xlsx]

## Sheet: AIMP1
Table S1. A - Identified proteins from AIMP1 precipitates in HEK293T cells and their SAINT probabilities.
Bait	Prey	PreyGene	Spec1	SpecSum2	AvgSpec3	ctrlCounts4	SaintScore5	FoldChange6	BFDR7
AIMP1	QARS	IPI00925046	132|318|283	733	244.33	0|0|4	1	183.25	0
AIMP1	RARS	IPI00004860	138|302|255	695	231.67	0|0|3	1	231.67	0
AIMP1	EPRS	IPI00013452	68|279|322	669	223	2|0|8	1	66.9	0
AIMP1	AIMP1_b	IPI00793201	0|340|296	636	212	0|0|0	1	2120	0
AIMP1	AIMP1	IPI00006252	125|341|0	466	155.33	0|0|0	1	1553.33	0
AIMP1	DARS	IPI00216951	95|143|138	376	125.33	3|3|8	1	26.86	0
AIMP1	IARS	IPI00644127	33|146|147	326	108.67	2|2|5	1	36.22	0
AIMP1	LARS	IPI00103994	12|106|101	219	73	0|0|0	1	730	0
AIMP1	MARS	IPI00008240	18|101|79	198	66	0|0|0	1	660	0
AIMP1	KARS	IPI00014238	32|62|43	137	45.67	0|0|4	1	34.25	0
AIMP1	AIMP2	IPI00011916	19|27|31	77	25.67	0|0|0	1	256.67	0
AIMP1	EEF1E1	IPI00003588	7|22|20	49	16.33	0|0|0	1	163.33	0
AIMP1	TARSL2	IPI00328082	0|24|11	35	11.67	0|0|0	1	116.67	0
AIMP1	RPS27A	IPI00179330	0|11|14	25	8.33	0|0|0	1	83.33	0
AIMP1	UBC	IPI01015985	0|11|13	24	8	0|0|0	1	80	0
AIMP1	TARS	IPI00329633	0|9|12	21	7	0|0|0	1	70	0
AIMP1	TUBB1	IPI00006510	5|8|7	20	6.67	0|0|0	1	66.67	0
AIMP1	RPS4Y1	IPI00302740	0|4|6	10	3.33	0|0|0	1	33.33	0
AIMP1	HNRNPH1	IPI00013881	3|5|0	8	2.67	0|0|0	1	26.67	0
AIMP1	RPL26	IPI00027270	0|5|3	8	2.67	0|0|0	1	26.67	0
AIMP1	PSMB5	IPI00479306	0|3|4	7	2.33	0|0|0	1	23.33	0
AIMP1	TMC7	IPI00375845	3|3|2	8	2.67	0|0|0	0.99	26.67	0.01
AIMP1	ATP1A1	IPI00006482	0|3|3	6	2	0|0|0	0.99	20	0.01
AIMP1	DMD	IPI00006091	0|4|2	6	2	0|0|0	0.98	20	0.02
AIMP1	RPS23	IPI00218606	0|3|2	5	1.67	0|0|0	0.98	16.67	0.02
AIMP1	H2AFV	IPI00018278	0|3|2	5	1.67	0|0|0	0.98	16.67	0.02
AIMP1	ETV6	IPI00013159	3|2|0	5	1.67	0|0|0	0.98	16.67	0.02
AIMP1	Conserved	IPI00983617	3|2|0	5	1.67	0|0|0	0.98	16.67	0.02
AIMP1	RPL27A	IPI00456758	0|3|2	5	1.67	0|0|0	0.98	16.67	0.02
AIMP1	SLC25A3	IPI00022202	0|3|2	5	1.67	0|0|0	0.98	16.67	0.02
AIMP1	RPS26P11	IPI00187140	0|3|2	5	1.67	0|0|0	0.98	16.67	0.02
AIMP1	RPL9	IPI00031691	0|3|2	5	1.67	0|0|0	0.98	16.67	0.02
AIMP1	IPI00397701	IPI00397701	0|6|6	12	4	0|2|2	0.97	3	0.03
AIMP1	RPS5	IPI00008433	0|2|2	4	1.33	0|0|0	0.97	13.33	0.03
AIMP1	TUBB4	IPI00023598	25|33|34	92	30.67	16|0|0	0.96	5.75	0.04
AIMP1	TUBA1B	IPI00930688	21|25|15	61	20.33	0|11|0	0.95	5.55	0.05
AIMP1	SLC25A4	IPI00022891	0|11|7	18	6	0|3|0	0.95	6	0.05
AIMP1	SLC25A5	IPI00007188	0|16|11	27	9	2|3|6	0.92	2.45	0.08
AIMP1	TUBA1A	IPI00180675	0|23|16	39	13	0|11|0	0.91	3.55	0.09
AIMP1	RPL6	IPI00790342	0|6|4	10	3.33	0|0|2	0.9	5	0.1
AIMP1	CHCHD3	IPI00015833	0|5|4	9	3	0|0|2	0.88	4.5	0.12
AIMP1	NPM1	IPI00220740	0|4|5	9	3	0|0|2	0.88	4.5	0.12
AIMP1	SNORA70	IPI00554723	0|8|3	11	3.67	0|0|2	0.85	5.5	0.15
AIMP1	TAOK3	IPI00410485	0|4|4	8	2.67	0|2|0	0.85	4	0.15
AIMP1	RPL23	IPI00010153	2|7|4	13	4.33	0|0|3	0.82	4.33	0.18
AIMP1	RPS27	IPI00397358	0|3|4	7	2.33	0|0|2	0.78	3.5	0.22
AIMP1	RPS6	IPI00021840	0|6|5	11	3.67	0|0|4	0.77	2.75	0.23
AIMP1	SLC25A6	IPI00291467	0|12|10	22	7.33	0|2|7	0.74	2.44	0.26
AIMP1	DDX23	IPI00006725	0|2|5	7	2.33	0|0|2	0.72	3.5	0.28
AIMP1	RPS7	IPI00013415	0|3|3	6	2	0|0|2	0.72	3	0.28
AIMP1	RPS25	IPI00012750	0|3|3	6	2	0|0|2	0.72	3	0.28
AIMP1	RPL15	IPI00470528	0|3|5	8	2.67	0|3|0	0.69	2.67	0.31
AIMP1	RPL35	IPI00412607	0|3|5	8	2.67	0|0|3	0.69	2.67	0.31
AIMP1	PDHA2	IPI00024087	0|4|5	9	3	0|0|4	0.65	2.25	0.35
AIMP1	RPL27	IPI00219155	2|4|3	9	3	0|0|3	0.64	3	0.36
AIMP1	EEF1D	IPI00023048	0|3|4	7	2.33	0|0|3	0.64	2.33	0.36
AIMP1	HSPA5	IPI00003362	4|29|20	53	17.67	8|7|9	0.63	2.21	0.37
AIMP1	CLTCL1	IPI00022881	0|8|3	11	3.67	0|4|0	0.63	2.75	0.37
AIMP1	YWHAE	IPI00000816	0|2|3	5	1.67	0|0|2	0.61	2.5	0.39
AIMP1	HNRNPR	IPI00012074	0|3|2	5	1.67	2|0|0	0.61	2.5	0.39
AIMP1	RPL4	IPI00003918	7|18|5	30	10	3|4|2	0.6	3.33	0.4
AIMP1	SF3B14	IPI00032827	0|5|5	10	3.33	0|2|3	0.57	2	0.43
AIMP1	DLST	IPI00033034	5|0|7	12	4	6|0|0	0.56	2	0.44
AIMP1	RPS15A	IPI00221091	0|7|5	12	4	0|3|3	0.56	2	0.44
AIMP1	XRCC6	IPI00644712	3|3|2	8	2.67	0|0|3	0.56	2.67	0.44
AIMP1	RPS16	IPI00221092	0|16|14	30	10	2|7|7	0.55	1.88	0.45
AIMP1	SNORD54	IPI00012493	0|5|3	8	2.67	0|0|4	0.54	2	0.46
AIMP1	ILF2	IPI00005198	0|3|5	8	2.67	0|0|4	0.54	2	0.46
AIMP1	SNORD43	IPI00550021	0|14|5	19	6.33	0|4|4	0.52	2.38	0.48
AIMP1	RPL23A	IPI00021266	0|4|2	6	2	0|0|3	0.52	2	0.48
AIMP1	RPL30	IPI00219156	2|11|4	17	5.67	0|4|3	0.51	2.43	0.49
AIMP1	PCBP1	IPI00016610	0|3|7	10	3.33	0|2|3	0.51	2	0.49
AIMP1	YWHAZ	IPI00021263	0|2|2	4	1.33	0|0|2	0.51	2	0.49
AIMP1	BAZ1B	IPI00069817	0|2|2	4	1.33	0|0|2	0.51	2	0.49
AIMP1	MC1R	IPI01015284	22|0|0	22	7.33	0|0|0	0.5	73.33	0.5
AIMP1	TUBA3E	IPI00410402	15|0|0	15	5	0|0|0	0.5	50	0.5
AIMP1	RPL7A	IPI00299573	0|9|3	12	4	0|3|3	0.5	2	0.5
AIMP1	SNORD21	IPI00000494	0|11|0	11	3.67	0|0|0	0.5	36.67	0.5
AIMP1	IPI00871956	IPI00871956	0|11|0	11	3.67	0|0|0	0.5	36.67	0.5
AIMP1	TUBB4Q	IPI00018511	9|0|0	9	3	0|0|0	0.5	30	0.5
AIMP1	IPI00174849	IPI00174849	9|0|0	9	3	0|0|0	0.5	30	0.5
AIMP1	PSMC5	IPI00023919	0|0|7	7	2.33	0|0|0	0.5	23.33	0.5
AIMP1	SNRPA1	IPI00297477	0|6|0	6	2	0|0|0	0.5	20	0.5
AIMP1	TUFM	IPI00027107	0|0|4	4	1.33	0|0|0	0.5	13.33	0.5
AIMP1	SLC25A31	IPI00010420	0|0|4	4	1.33	0|0|0	0.5	13.33	0.5
AIMP1	RPS12	IPI00013917	0|4|0	4	1.33	0|0|0	0.5	13.33	0.5
AIMP1	IPI00847956	IPI00847956	0|0|4	4	1.33	0|0|0	0.5	13.33	0.5
AIMP1	RPL35A	IPI00029731	0|4|0	4	1.33	0|0|0	0.5	13.33	0.5
AIMP1	DDX6	IPI00030320	0|4|0	4	1.33	0|0|0	0.5	13.33	0.5
AIMP1	ZNF830	IPI00043565	0|0|4	4	1.33	0|0|0	0.5	13.33	0.5
AIMP1	NEFH	IPI00386758	0|4|0	4	1.33	0|0|0	0.5	13.33	0.5
AIMP1	CDC42BPA	IPI00550263	0|0|4	4	1.33	0|0|0	0.5	13.33	0.5
AIMP1	RPS26	IPI00655650	0|3|0	3	1	0|0|0	0.5	10	0.5
AIMP1	LMTK2	IPI00217391	0|3|0	3	1	0|0|0	0.5	10	0.5
AIMP1	VDAC2	IPI00024145	0|0|3	3	1	0|0|0	0.5	10	0.5
AIMP1	ZEB1	IPI00375505	0|3|0	3	1	0|0|0	0.5	10	0.5
AIMP1	HNRNPF	IPI00003881	3|0|0	3	1	0|0|0	0.5	10	0.5
AIMP1	MTUS2	IPI00829933	0|3|0	3	1	0|0|0	0.5	10	0.5
AIMP1	YWHAQ	IPI00018146	0|0|3	3	1	0|0|0	0.5	10	0.5
AIMP1	PSMB6	IPI00000811	0|0|3	3	1	0|0|0	0.5	10	0.5
AIMP1	TUBA4B	IPI00017454	0|3|0	3	1	0|0|0	0.5	10	0.5
AIMP1	YWHAG	IPI00220642	0|3|0	3	1	0|0|0	0.5	10	0.5
AIMP1	PLCXD2	IPI00867633	0|3|0	3	1	0|0|0	0.5	10	0.5
AIMP1	C6orf97	IPI00216412	0|0|3	3	1	0|0|0	0.5	10	0.5
AIMP1	IPI00062151	IPI00062151	0|0|3	3	1	0|0|0	0.5	10	0.5
AIMP1	CCDC147	IPI00174574	0|0|3	3	1	0|0|0	0.5	10	0.5
AIMP1	RAPGEF4	IPI00329560	0|0|3	3	1	0|0|0	0.5	10	0.5
AIMP1	HNRNPM	IPI00171903	0|3|0	3	1	0|0|0	0.5	10	0.5
AIMP1	MCCC2	IPI00784044	0|3|0	3	1	0|0|0	0.5	10	0.5
AIMP1	HTATSF1	IPI00013788	0|3|0	3	1	0|0|0	0.5	10	0.5
AIMP1	NSUN2	IPI00306369	0|3|0	3	1	0|0|0	0.5	10	0.5
AIMP1	CEP350	IPI00103595	0|3|0	3	1	0|0|0	0.5	10	0.5
AIMP1	DNAH2	IPI00651691	0|3|0	3	1	0|0|0	0.5	10	0.5
AIMP1	SSPO	IPI00843797	0|3|0	3	1	0|0|0	0.5	10	0.5
AIMP1	TUBA4A	IPI00007750	17|21|0	38	12.67	6|8|8	0.49	1.73	0.51
AIMP1	RPS2	IPI00013485	0|14|3	17	5.67	3|0|5	0.49	2.13	0.51
AIMP1	FLJ27420	IPI00442381	0|7|0	7	2.33	0|0|2	0.49	3.5	0.51
AIMP1	ATP8A2	IPI00465166	0|2|0	2	0.67	0|0|0	0.48	6.67	0.52
AIMP1	LMNB2	IPI00009771	2|0|0	2	0.67	0|0|0	0.48	6.67	0.52
AIMP1	RPL32	IPI00395998	0|2|0	2	0.67	0|0|0	0.48	6.67	0.52
AIMP1	LIX1	IPI00296593	0|2|0	2	0.67	0|0|0	0.48	6.67	0.52
AIMP1	TG	IPI00985038	0|0|2	2	0.67	0|0|0	0.48	6.67	0.52
AIMP1	SLC25A11	IPI00219729	0|0|2	2	0.67	0|0|0	0.48	6.67	0.52
AIMP1	VDAC3	IPI00031804	0|0|2	2	0.67	0|0|0	0.48	6.67	0.52
AIMP1	ATP5C1	IPI00395769	0|0|2	2	0.67	0|0|0	0.48	6.67	0.52
AIMP1	SNRPF	IPI00220528	0|2|0	2	0.67	0|0|0	0.48	6.67	0.52
AIMP1	IPI00749373	IPI00749373	0|0|2	2	0.67	0|0|0	0.48	6.67	0.52
AIMP1	PGAP2	IPI00442842	0|2|0	2	0.67	0|0|0	0.48	6.67	0.52
AIMP1	TPM1	IPI00018853	0|2|0	2	0.67	0|0|0	0.48	6.67	0.52
AIMP1	PSMA3	IPI00171199	0|0|2	2	0.67	0|0|0	0.48	6.67	0.52
AIMP1	GBP1	IPI00028564	0|0|2	2	0.67	0|0|0	0.48	6.67	0.52
AIMP1	RPL29	IPI00419919	0|0|2	2	0.67	0|0|0	0.48	6.67	0.52
AIMP1	RPL10L	IPI00064765	0|0|2	2	0.67	0|0|0	0.48	6.67	0.52
AIMP1	DTD1	IPI00152692	2|0|0	2	0.67	0|0|0	0.48	6.67	0.52
AIMP1	MRGPRX3	IPI00984728	2|0|0	2	0.67	0|0|0	0.48	6.67	0.52
AIMP1	RPL36	IPI00216237	0|2|0	2	0.67	0|0|0	0.48	6.67	0.52
AIMP1	IPI00782963	IPI00782963	0|2|0	2	0.67	0|0|0	0.48	6.67	0.52
AIMP1	TRAF4	IPI00162088	0|2|0	2	0.67	0|0|0	0.48	6.67	0.52
AIMP1	SRP14	IPI00293434	0|2|0	2	0.67	0|0|0	0.48	6.67	0.52
AIMP1	SNRPB2	IPI00029267	0|2|0	2	0.67	0|0|0	0.48	6.67	0.52
AIMP1	FLH26326	IPI00442879	0|2|0	2	0.67	0|0|0	0.48	6.67	0.52
AIMP1	RPS10	IPI00008438	0|2|0	2	0.67	0|0|0	0.48	6.67	0.52
AIMP1	Putative	IPI00923578	0|2|0	2	0.67	0|0|0	0.48	6.67	0.52
AIMP1	IPI00792761	IPI00792761	0|2|0	2	0.67	0|0|0	0.48	6.67	0.52
AIMP1	LSM12	IPI00410324	0|2|0	2	0.67	0|0|0	0.48	6.67	0.52
AIMP1	RPS10P5	IPI00025842	0|2|0	2	0.67	0|0|0	0.48	6.67	0.52
AIMP1	SNRPB	IPI00329512	0|0|2	2	0.67	0|0|0	0.48	6.67	0.52
AIMP1	ACLY	IPI00021290	0|0|2	2	0.67	0|0|0	0.48	6.67	0.52
AIMP1	ALDH3A2	IPI00333619	2|0|0	2	0.67	0|0|0	0.48	6.67	0.52
AIMP1	FERMT1	IPI00304754	2|0|0	2	0.67	0|0|0	0.48	6.67	0.52
AIMP1	FOXJ3	IPI00010426	0|2|0	2	0.67	0|0|0	0.48	6.67	0.52
AIMP1	IPI00848328	IPI00848328	0|2|0	2	0.67	0|0|0	0.48	6.67	0.52
AIMP1	PSMC2	IPI00021435	0|2|0	2	0.67	0|0|0	0.48	6.67	0.52
AIMP1	CGN	IPI00844508	0|0|2	2	0.67	0|0|0	0.48	6.67	0.52
AIMP1	ST3GAL4	IPI00306884	2|0|0	2	0.67	0|0|0	0.48	6.67	0.52
AIMP1	ELAVL1	IPI00301936	0|2|0	2	0.67	0|0|0	0.48	6.67	0.52
AIMP1	DUX2	IPI00382872	2|0|0	2	0.67	0|0|0	0.48	6.67	0.52
AIMP1	OGDH	IPI00098902	0|2|0	2	0.67	0|0|0	0.48	6.67	0.52
AIMP1	HSPH1	IPI00218993	0|0|2	2	0.67	0|0|0	0.48	6.67	0.52
AIMP1	ZNF117	IPI00026249	0|2|0	2	0.67	0|0|0	0.48	6.67	0.52
AIMP1	DDX21	IPI00015953	0|2|0	2	0.67	0|0|0	0.48	6.67	0.52
AIMP1	HNRNPL	IPI00027834	0|2|0	2	0.67	0|0|0	0.48	6.67	0.52
AIMP1	OGDHL	IPI00643720	0|0|2	2	0.67	0|0|0	0.48	6.67	0.52
AIMP1	CAPRIN1	IPI00783872	0|2|0	2	0.67	0|0|0	0.48	6.67	0.52
AIMP1	UBR2	IPI00217407	0|2|0	2	0.67	0|0|0	0.48	6.67	0.52
AIMP1	LARP1B	IPI00383949	0|2|0	2	0.67	0|0|0	0.48	6.67	0.52
AIMP1	EIF3B	IPI00396370	0|2|0	2	0.67	0|0|0	0.48	6.67	0.52
AIMP1	KLB	IPI00179694	0|2|0	2	0.67	0|0|0	0.48	6.67	0.52
AIMP1	C3	IPI00783987	0|2|0	2	0.67	0|0|0	0.48	6.67	0.52
AIMP1	C9orf174	IPI00292836	0|2|0	2	0.67	0|0|0	0.48	6.67	0.52
AIMP1	SYTL2	IPI00418194	2|0|0	2	0.67	0|0|0	0.48	6.67	0.52
AIMP1	TTC6	IPI00983166	0|2|0	2	0.67	0|0|0	0.48	6.67	0.52
AIMP1	VCAN	IPI00009802	0|2|0	2	0.67	0|0|0	0.48	6.67	0.52
AIMP1	RPL7P32	IPI00030179	4|17|8	29	9.67	2|8|4	0.47	2.07	0.53
AIMP1	RPS8	IPI00216587	3|13|7	23	7.67	0|4|6	0.47	2.3	0.53
AIMP1	DDX46	IPI00329791	0|14|0	14	4.67	0|6|0	0.47	2.33	0.53
AIMP1	RPS24	IPI00029750	0|7|2	9	3	0|2|3	0.47	1.8	0.53
AIMP1	IMMT	IPI00009960	0|7|0	7	2.33	0|0|3	0.46	2.33	0.54
AIMP1	HNRNPU	IPI00479217	0|6|7	13	4.33	0|3|4	0.45	1.86	0.55
AIMP1	PARP1	IPI00449049	2|0|3	5	1.67	3|0|0	0.44	1.67	0.56
AIMP1	RBM25	IPI00004273	0|4|9	13	4.33	0|2|5	0.43	1.86	0.57
AIMP1	RPL19	IPI00025329	0|4|0	4	1.33	0|0|2	0.42	2	0.58
AIMP1	RPS11	IPI00025091	0|4|0	4	1.33	0|0|2	0.42	2	0.58
AIMP1	SLC25A12	IPI00386271	0|4|0	4	1.33	0|0|2	0.42	2	0.58
AIMP1	DHX9	IPI00844578	0|4|0	4	1.33	0|0|2	0.42	2	0.58
AIMP1	TNIK	IPI00145805	0|4|0	4	1.33	0|0|2	0.42	2	0.58
AIMP1	SLC25A13	IPI00007084	0|4|0	4	1.33	0|0|2	0.42	2	0.58
AIMP1	TUBA8	IPI00646909	0|12|0	12	4	0|6|4	0.4	1.2	0.6
AIMP1	IPI00017870	IPI00017870	0|7|0	7	2.33	0|5|0	0.4	1.4	0.6
AIMP1	TUBB6	IPI00646779	14|21|14	49	16.33	7|7|9	0.39	2.13	0.61
AIMP1	TP53	IPI00895905	0|9|0	9	3	0|0|7	0.39	1.29	0.61
AIMP1	TUBBP5	IPI00739915	6|15|12	33	11	0|5|9	0.37	2.36	0.63
AIMP1	RPL14	IPI00555744	3|10|5	18	6	0|4|5	0.37	2	0.63
AIMP1	POTEE	IPI00479743	0|0|5	5	1.67	0|0|4	0.36	1.25	0.64
AIMP1	IPI01010194	IPI01010194	0|0|3	3	1	0|0|2	0.36	1.5	0.64
AIMP1	SYNCRIP	IPI00018140	0|3|0	3	1	0|0|2	0.36	1.5	0.64
AIMP1	CHERP	IPI00333010	0|0|3	3	1	2|0|0	0.36	1.5	0.64
AIMP1	NCKAP1L	IPI00023407	0|0|3	3	1	0|2|0	0.36	1.5	0.64
AIMP1	RPL22	IPI00219153	0|7|5	12	4	0|2|5	0.35	1.71	0.65
AIMP1	IPI00180730	IPI00180730	0|8|0	8	2.67	0|0|7	0.35	1.14	0.65
AIMP1	RPL12	IPI00024933	3|10|8	21	7	0|4|6	0.34	2.1	0.66
AIMP1	RPL24	IPI00306332	2|5|3	10	3.33	0|3|2	0.34	2	0.66
AIMP1	RPL18A	IPI00026202	0|6|4	10	3.33	0|2|4	0.34	1.67	0.66
AIMP1	TUBB8	IPI00292496	0|20|17	37	12.33	0|9|10	0.3	1.95	0.7
AIMP1	HSPA4	IPI00002966	0|0|4	4	1.33	0|2|2	0.3	1	0.7
AIMP1	PCBP2	IPI00012066	0|4|4	8	2.67	0|2|3	0.29	1.6	0.71
AIMP1	TAOK1	IPI00002232	0|4|4	8	2.67	0|3|2	0.29	1.6	0.71
AIMP1	RPS19	IPI00215780	0|0|5	5	1.67	0|2|3	0.29	1	0.71
AIMP1	SNRPD3	IPI00017964	0|5|0	5	1.67	0|3|2	0.29	1	0.71
AIMP1	TRAP1	IPI00030275	0|0|4	4	1.33	4|0|0	0.29	1	0.71
AIMP1	RPS13	IPI00221089	0|8|4	12	4	0|3|5	0.28	1.5	0.72
AIMP1	EEF1A1	IPI00396485	0|8|0	8	2.67	0|0|8	0.28	1	0.72
AIMP1	SF3B4	IPI00017339	0|3|0	3	1	0|3|0	0.28	1	0.72
AIMP1	XRCC5	IPI00220834	0|0|3	3	1	0|0|3	0.28	1	0.72
AIMP1	PSMA6	IPI00029623	0|0|2	2	0.67	0|2|0	0.26	1	0.74
AIMP1	FHL1	IPI00014398	0|0|2	2	0.67	0|0|2	0.26	1	0.74
AIMP1	PRDX4	IPI00011937	0|0|2	2	0.67	0|0|2	0.26	1	0.74
AIMP1	DNAJA1	IPI00012535	0|0|2	2	0.67	0|0|2	0.26	1	0.74
AIMP1	CTTNBP2	IPI00103869	0|0|2	2	0.67	0|0|2	0.26	1	0.74
AIMP1	KDM1A	IPI00217540	0|3|3	6	2	0|2|2	0.25	1.5	0.75
AIMP1	MIF	IPI00293276	0|2|3	5	1.67	0|0|4	0.25	1.25	0.75
AIMP1	TUBB3	IPI00013683	22|30|26	78	26	14|0|14	0.21	2.79	0.79
AIMP1	RPL11	IPI00376798	3|8|6	17	5.67	0|2|7	0.21	1.89	0.79
AIMP1	RPL21	IPI00247583	0|3|4	7	2.33	0|2|3	0.2	1.4	0.8
AIMP1	DSP	IPI00013933	0|3|3	6	2	0|0|5	0.18	1.2	0.82
AIMP1	IPI00478327	IPI00478327	0|3|0	3	1	0|0|4	0.18	0.75	0.82
AIMP1	SNRPD2	IPI00017963	0|3|0	3	1	0|0|4	0.18	0.75	0.82
AIMP1	RPL13	IPI00465361	0|10|10	20	6.67	0|4|8	0.17	1.67	0.83
AIMP1	PABPC1L	IPI00556259	0|5|0	5	1.67	2|0|4	0.16	0.83	0.84
AIMP1	IPI00844382	IPI00844382	0|0|2	2	0.67	0|0|3	0.16	0.67	0.84
AIMP1	PSMA7	IPI00024175	0|2|0	2	0.67	0|0|3	0.16	0.67	0.84
AIMP1	PHB2	IPI00027252	0|6|12	18	6	0|5|8	0.15	1.38	0.85
AIMP1	AHSA1	IPI00030706	0|9|8	17	5.67	0|4|7	0.13	1.55	0.87
AIMP1	EEF1G	IPI00000875	0|8|9	17	5.67	0|3|8	0.13	1.55	0.87
AIMP1	RPL8	IPI00012772	3|8|4	15	5	3|4|3	0.12	1.5	0.88
AIMP1	TUBB	IPI01019113	29|39|37	105	35	16|0|21	0.11	2.84	0.89
AIMP1	PHB	IPI00017334	0|5|6	11	3.67	0|3|5	0.11	1.38	0.89
AIMP1	PHF5A	IPI00005511	0|3|3	6	2	0|2|3	0.1	1.2	0.9
AIMP1	HSP90AB1	IPI00414676	0|4|9	13	4.33	0|5|6	0.09	1.18	0.91
AIMP1	RPS14	IPI00026271	0|6|3	9	3	2|3|3	0.09	1.12	0.91
AIMP1	SNORD73A	IPI00419880	0|21|18	39	13	2|11|10	0.08	1.7	0.92
AIMP1	SNORD32A	IPI00304612	3|7|2	12	4	0|4|5	0.08	1.33	0.92
AIMP1	RPL28	IPI00182533	0|4|3	7	2.33	0|3|3	0.08	1.17	0.92
AIMP1	ABI1	IPI00431025	9|8|3	20	6.67	3|4|5	0.07	1.67	0.93
AIMP1	RPL10A	IPI00412579	2|5|0	7	2.33	0|4|3	0.07	1	0.93
AIMP1	CCT3	IPI00552715	0|0|2	2	0.67	0|0|4	0.07	0.5	0.93
AIMP1	TUBA1C	IPI00218343	21|23|0	44	14.67	0|12|13	0.05	1.76	0.95
AIMP1	EIF3L	IPI00465233	2|0|4	6	2	0|0|7	0.05	0.86	0.95
AIMP1	IPI00844513	IPI00844513	0|13|15	28	9.33	0|4|14	0.04	1.56	0.96
AIMP1	PCMT1	IPI00411680	0|13|7	20	6.67	0|4|12	0.04	1.25	0.96
AIMP1	RPS9	IPI00221088	0|4|6	10	3.33	0|2|7	0.04	1.11	0.96
AIMP1	RPS4Y2	IPI00219894	0|4|6	10	3.33	0|3|6	0.04	1.11	0.96
AIMP1	RPL17	IPI00413324	0|4|3	7	2.33	0|2|5	0.04	1	0.96
AIMP1	PABPC3	IPI00301154	0|8|0	8	2.67	0|0|12	0.03	0.67	0.97
AIMP1	CCT4	IPI00302927	0|4|3	7	2.33	2|3|2	0.03	1	0.97
AIMP1	PRDX1	IPI00000874	0|3|4	7	2.33	0|3|4	0.03	1	0.97
AIMP1	ACTBL2	IPI00003269	0|0|2	2	0.67	0|0|5	0.03	0.4	0.97
AIMP1	PRSS3	IPI00015614	5|0|0	5	1.67	9|0|0	0.02	0.56	0.98
AIMP1	RPL26L1	IPI00007144	0|0|3	3	1	0|2|4	0.02	0.5	0.98
AIMP1	DLAT	IPI00021338	3|12|10	25	8.33	3|5|9	0.01	1.47	0.99
AIMP1	RPL18	IPI00215719	4|12|7	23	7.67	3|6|8	0.01	1.35	0.99
AIMP1	EEF1A2	IPI00014424	3|6|5	14	4.67	0|4|7	0.01	1.27	0.99
AIMP1	PRPF40A	IPI00337385	0|4|2	6	2	0|2|6	0.01	0.75	0.99
AIMP1	DBT	IPI00003944	143|176|109	428	142.67	132|162|128	0	1.01	1
AIMP1	HSPA8	IPI00003865	17|65|64	146	48.67	12|30|45	0	1.68	1
AIMP1	CYFIP1	IPI00644231	8|63|60	131	43.67	30|54|57	0	0.93	1
AIMP1	SF3A1	IPI00017451	3|50|72	125	41.67	15|38|60	0	1.11	1
AIMP1	NCKAP1	IPI00031982	10|60|53	123	41	25|39|39	0	1.19	1
AIMP1	CKAP4	IPI00141318	6|61|37	104	34.67	3|39|60	0	1.02	1
AIMP1	TUBB2C	IPI00007752	29|37|37	103	34.33	21|17|23	0	1.69	1
AIMP1	HSPA1B	IPI00304925	11|48|43	102	34	0|25|28	0	1.92	1
AIMP1	CYFIP2	IPI00719600	5|46|38	89	29.67	24|36|40	0	0.89	1
AIMP1	TUBB2A	IPI00013475	23|33|28	84	28	13|14|17	0	1.91	1
AIMP1	HSPA2	IPI00007702	10|37|32	79	26.33	0|21|25	0	1.72	1
AIMP1	SF3B3	IPI00300371	5|37|30	72	24	7|21|25	0	1.36	1
AIMP1	HSPA1L	IPI00643152	9|33|29	71	23.67	9|20|19	0	1.48	1
AIMP1	IPI01025580	IPI01025580	22|25|24	71	23.67	27|27|39	0	0.76	1
AIMP1	HSPA6	IPI00339269	7|33|28	68	22.67	7|18|20	0	1.51	1
AIMP1	SF3A3	IPI00029764	11|18|22	51	17	5|17|18	0	1.27	1
AIMP1	TUBA3D	IPI00179709	18|19|13	50	16.67	9|9|10	0	1.79	1
AIMP1	CLTC	IPI00024067	2|22|13	37	12.33	3|12|20	0	1.06	1
AIMP1	SF3B1	IPI00026089	0|21|16	37	12.33	2|20|14	0	1.03	1
AIMP1	BCKDHA	IPI00025100	4|11|15	30	10	10|6|10	0	1.15	1
AIMP1	LOC728638	IPI00787323	7|11|11	29	9.67	0|12|17	0	1	1
AIMP1	PDHA1	IPI00306301	2|12|15	29	9.67	4|10|17	0	0.94	1
AIMP1	PDHB	IPI00003925	3|14|10	27	9	8|8|10	0	1.04	1
AIMP1	SF3B2	IPI00221106	0|18|8	26	8.67	3|12|9	0	1.08	1
AIMP1	RPS18	IPI00013296	0|12|12	24	8	2|9|11	0	1.09	1
AIMP1	SF3A2	IPI00017341	6|7|10	23	7.67	3|5|9	0	1.35	1
AIMP1	RPS3	IPI00011253	2|9|11	22	7.33	3|6|8	0	1.29	1
AIMP1	RPLP0	IPI00008530	5|9|5	19	6.33	5|5|5	0	1.27	1
AIMP1	DLD	IPI00015911	8|9|2	19	6.33	6|10|11	0	0.7	1
AIMP1	WASF2	IPI00472164	5|8|6	19	6.33	6|7|9	0	0.86	1
AIMP1	RPS4X	IPI00217030	2|9|7	18	6	3|5|8	0	1.12	1
AIMP1	PHGDH	IPI00011200	4|6|6	16	5.33	4|4|4	0	1.33	1
AIMP1	PABPC1	IPI00008524	2|9|2	13	4.33	2|5|15	0	0.59	1
AIMP1	ATP5A1	IPI00440493	2|4|5	11	3.67	6|0|5	0	1	1
AIMP1	WASF1	IPI00022007	2|3|6	11	3.67	2|5|5	0	0.92	1
AIMP1	HSPD1	IPI00784154	3|4|4	11	3.67	3|4|5	0	0.92	1
AIMP1	HSPA9	IPI00007765	0|4|5	9	3	5|4|2	0	0.82	1
AIMP1	RPS17	IPI00221093	0|5|3	8	2.67	0|4|6	0	0.8	1
AIMP1	BCKDHB	IPI00011276	3|2|3	8	2.67	5|2|4	0	0.73	1
AIMP1	GFAP	IPI00025363	0|5|0	5	1.67	0|0|14	0	0.36	1
AIMP1	ACTB	IPI00021439	0|0|4	4	1.33	0|4|5	0	0.44	1
AIMP1	HSP90AA1	IPI00382470	0|4|0	4	1.33	3|4|5	0	0.33	1
AIMP1	PABPC4	IPI00012726	0|3|0	3	1	2|2|5	0	0.33	1
AIMP1	ILF3	IPI00219330	0|2|0	2	0.67	0|4|2	0	0.33	1
Spec1 ; the number of spectra in three replicates
SpecSum2 ; sum of spectra in three replicates
AvgSpec3 ; the average number of spectra in three replicates
ctrlCounts4 ; the number of spectra acquired in three replicates of Mock
SaintScore5 ; score acquired by SAINTexpress
FoldChange6
BFDR7

## Sheet: AIMP2
Table S1. B - Identified proteins from AIMP2 precipitates in HEK293T cells and their SAINT probabilities.
Bait	Prey	PreyGene	Spec1	SpecSum2	AvgSpec3	ctrlCounts4	SaintScore5	FoldChange6	BFDR7
AIMP2	EPRS	IPI00013452	412|609|488	1509	503	2|0|8	1	150.9	0
AIMP2	QARS	IPI00925046	173|299|226	698	232.67	0|0|4	1	174.5	0
AIMP2	IARS	IPI00644127	183|290|207	680	226.67	2|2|5	1	75.56	0
AIMP2	RARS	IPI00004860	140|245|163	548	182.67	0|0|3	1	182.67	0
AIMP2	DARS	IPI00216951	141|213|165	519	173	3|3|8	1	37.07	0
AIMP2	AIMP2	IPI00011916	100|286|89	475	158.33	0|0|0	1	1583.33	0
AIMP2	LARS	IPI00103994	109|197|118	424	141.33	0|0|0	1	1413.33	0
AIMP2	TUBB	IPI01019113	140|156|122	418	139.33	16|0|21	1	11.3	0
AIMP2	TUBB2C	IPI00007752	136|156|123	415	138.33	21|17|23	1	6.8	0
AIMP2	TUBB2A	IPI00013475	122|142|117	381	127	13|14|17	1	8.66	0
AIMP2	TUBB4	IPI00023598	109|127|101	337	112.33	16|0|0	1	21.06	0
AIMP2	MARS	IPI00008240	77|119|70	266	88.67	0|0|0	1	886.67	0
AIMP2	TUBB2B	IPI00031370	122|141|0	263	87.67	0|0|0	1	876.67	0
AIMP2	TUBB3	IPI00013683	74|90|70	234	78	14|0|14	1	8.36	0
AIMP2	TUBA1B	IPI00930688	77|91|59	227	75.67	0|11|0	1	20.64	0
AIMP2	TUBA1A	IPI00180675	75|86|57	218	72.67	0|11|0	1	19.82	0
AIMP2	TUBB8	IPI00292496	69|74|70	213	71	0|9|10	1	11.21	0
AIMP2	TUBA1C	IPI00218343	73|82|57	212	70.67	0|12|13	1	8.48	0
AIMP2	AIMP1	IPI00006252	53|112|43	208	69.33	0|0|0	1	693.33	0
AIMP2	TUBB6	IPI00646779	66|75|53	194	64.67	7|7|9	1	8.43	0
AIMP2	IPI00174849	IPI00174849	62|66|62	190	63.33	0|0|0	1	633.33	0
AIMP2	TUBA3D	IPI00179709	60|74|49	183	61	9|9|10	1	6.54	0
AIMP2	TUBA4A	IPI00007750	52|68|49	169	56.33	6|8|8	1	7.68	0
AIMP2	KARS	IPI00014238	32|85|47	164	54.67	0|0|4	1	41	0
AIMP2	TUBBP5	IPI00739915	52|55|57	164	54.67	0|5|9	1	11.71	0
AIMP2	MC1R	IPI01015284	0|91|70	161	53.67	0|0|0	1	536.67	0
AIMP2	TUBA3E	IPI00410402	47|62|39	148	49.33	0|0|0	1	493.33	0
AIMP2	SLC25A5	IPI00007188	31|72|31	134	44.67	2|3|6	1	12.18	0
AIMP2	SLC25A6	IPI00291467	23|53|23	99	33	0|2|7	1	11	0
AIMP2	TUBA8	IPI00646909	31|36|28	95	31.67	0|6|4	1	9.5	0
AIMP2	SLC25A4	IPI00022891	19|47|18	84	28	0|3|0	1	28	0
AIMP2	HSP90AB1	IPI00414676	10|45|26	81	27	0|5|6	1	7.36	0
AIMP2	HSP90AA1	IPI00382470	8|45|22	75	25	3|4|5	1	6.25	0
AIMP2	TUBB1	IPI00006510	18|27|27	72	24	0|0|0	1	240	0
AIMP2	ATP1A1	IPI00006482	13|22|24	59	19.67	0|0|0	1	196.67	0
AIMP2	EEF1E1	IPI00003588	15|31|12	58	19.33	0|0|0	1	193.33	0
AIMP2	HSP90AB3P	IPI00555614	2|33|14	49	16.33	0|0|3	1	16.33	0
AIMP2	DNAJA1	IPI00012535	5|27|8	40	13.33	0|0|2	1	20	0
AIMP2	TARSL2	IPI00328082	12|19|8	39	13	0|0|0	1	130	0
AIMP2	SLC25A13	IPI00007084	6|21|11	38	12.67	0|0|2	1	19	0
AIMP2	AIFM1	IPI00000690	6|18|13	37	12.33	0|0|0	1	123.33	0
AIMP2	ATP1A3	IPI00302840	7|12|14	33	11	0|0|0	1	110	0
AIMP2	RPS27A	IPI00179330	6|14|12	32	10.67	0|0|0	1	106.67	0
AIMP2	RPL4	IPI00003918	12|14|6	32	10.67	3|4|2	1	3.56	0
AIMP2	PCNA	IPI00021700	4|18|9	31	10.33	0|0|0	1	103.33	0
AIMP2	TARS	IPI00329633	4|19|7	30	10	0|0|0	1	100	0
AIMP2	FANCI	IPI00306518	0|25|4	29	9.67	0|0|0	1	96.67	0
AIMP2	HSP90AA2	IPI00031523	0|19|9	28	9.33	0|0|0	1	93.33	0
AIMP2	SLC25A3	IPI00022202	4|18|5	27	9	0|0|0	1	90	0
AIMP2	ATP2A2	IPI00177817	2|16|9	27	9	0|0|0	1	90	0
AIMP2	EMD	IPI00032003	3|15|7	25	8.33	0|0|0	1	83.33	0
AIMP2	FLII	IPI00031023	2|15|8	25	8.33	0|0|0	1	83.33	0
AIMP2	SLC25A31	IPI00010420	5|15|4	24	8	0|0|0	1	80	0
AIMP2	DNAJA2	IPI00032406	3|13|7	23	7.67	0|0|0	1	76.67	0
AIMP2	ATP1A4	IPI00375339	4|7|8	19	6.33	0|0|0	1	63.33	0
AIMP2	ATP5B	IPI00303476	7|2|8	17	5.67	0|0|0	1	56.67	0
AIMP2	HSP90AB4P	IPI00555565	0|12|5	17	5.67	0|0|0	1	56.67	0
AIMP2	SSR4	IPI00019385	4|6|6	16	5.33	0|0|0	1	53.33	0
AIMP2	TUFM	IPI00027107	4|6|6	16	5.33	0|0|0	1	53.33	0
AIMP2	COPB1	IPI00295851	4|0|12	16	5.33	0|0|0	1	53.33	0
AIMP2	ATP2A1	IPI00024804	0|12|4	16	5.33	0|0|0	1	53.33	0
AIMP2	VDAC3	IPI00031804	2|10|3	15	5	0|0|0	1	50	0
AIMP2	IPI00978107	IPI00978107	0|10|5	15	5	0|0|0	1	50	0
AIMP2	HSPH1	IPI00218993	0|8|6	14	4.67	0|0|0	1	46.67	0
AIMP2	ATP2A3	IPI00004092	3|11|0	14	4.67	0|0|0	1	46.67	0
AIMP2	MCM7	IPI00299904	7|0|6	13	4.33	0|0|0	1	43.33	0
AIMP2	TMC7	IPI00375845	2|5|5	12	4	0|0|0	1	40	0
AIMP2	VDAC2	IPI00024145	2|6|4	12	4	0|0|0	1	40	0
AIMP2	PSMB5	IPI00479306	0|7|5	12	4	0|0|0	1	40	0
AIMP2	CDIPT	IPI00645518	0|7|5	12	4	0|0|0	1	40	0
AIMP2	SLC25A22	IPI00003004	0|8|4	12	4	0|0|0	1	40	0
AIMP2	VDAC1	IPI00216308	2|6|3	11	3.67	0|0|0	1	36.67	0
AIMP2	SNRPA1	IPI00297477	0|7|4	11	3.67	0|0|0	1	36.67	0
AIMP2	KIAA1009	IPI00007122	4|4|2	10	3.33	0|0|0	1	33.33	0
AIMP2	SLC25A11	IPI00219729	0|5|5	10	3.33	0|0|0	1	33.33	0
AIMP2	ATP5C1	IPI00395769	0|7|3	10	3.33	0|0|0	1	33.33	0
AIMP2	KPNB1	IPI00001639	0|6|4	10	3.33	0|0|0	1	33.33	0
AIMP2	FAR1	IPI00478838	0|5|4	9	3	0|0|0	1	30	0
AIMP2	HNRNPH1	IPI00013881	3|3|2	8	2.67	0|0|0	1	26.67	0
AIMP2	ZEB1	IPI00375505	5|0|3	8	2.67	0|0|0	1	26.67	0
AIMP2	SNRPF	IPI00220528	0|3|5	8	2.67	0|0|0	1	26.67	0
AIMP2	YWHAQ	IPI00018146	0|4|4	8	2.67	0|0|0	1	26.67	0
AIMP2	PSMA3	IPI00171199	0|4|4	8	2.67	0|0|0	1	26.67	0
AIMP2	ARF4	IPI00215918	0|4|3	7	2.33	0|0|0	1	23.33	0
AIMP2	PSMD9	IPI00010860	0|4|3	7	2.33	0|0|0	1	23.33	0
AIMP2	H2AFV	IPI00018278	0|3|3	6	2	0|0|0	1	20	0
AIMP2	DDX6	IPI00030320	0|3|3	6	2	0|0|0	1	20	0
AIMP2	PSMC1	IPI00011126	0|3|3	6	2	0|0|0	1	20	0
AIMP2	CGN	IPI00844508	0|3|3	6	2	0|0|0	1	20	0
AIMP2	RPS27	IPI00397358	3|10|7	20	6.67	0|0|2	0.99	10	0.01
AIMP2	BAG2	IPI00000643	2|10|2	14	4.67	0|0|0	0.99	46.67	0.01
AIMP2	PSMC3	IPI00018398	0|11|2	13	4.33	0|0|0	0.99	43.33	0.01
AIMP2	LMNB2	IPI00009771	2|4|2	8	2.67	0|0|0	0.99	26.67	0.01
AIMP2	RPS23	IPI00218606	2|4|2	8	2.67	0|0|0	0.99	26.67	0.01
AIMP2	RPL26	IPI00027270	2|5|0	7	2.33	0|0|0	0.99	23.33	0.01
AIMP2	SNORA6	IPI00413108	0|2|5	7	2.33	0|0|0	0.99	23.33	0.01
AIMP2	RPS12	IPI00013917	0|4|2	6	2	0|0|0	0.99	20	0.01
AIMP2	TG	IPI00985038	0|4|2	6	2	0|0|0	0.99	20	0.01
AIMP2	ERLIN1	IPI00007940	2|4|0	6	2	0|0|0	0.99	20	0.01
AIMP2	MCOLN1	IPI00003750	4|0|2	6	2	0|0|0	0.99	20	0.01
AIMP2	TIMM50	IPI00418497	0|4|2	6	2	0|0|0	0.99	20	0.01
AIMP2	UQCRC2	IPI00305383	4|2|0	6	2	0|0|0	0.99	20	0.01
AIMP2	IRS4	IPI00020729	2|4|0	6	2	0|0|0	0.99	20	0.01
AIMP2	DMD	IPI00006091	2|4|0	6	2	0|0|0	0.99	20	0.01
AIMP2	C10orf27	IPI00065315	0|3|2	5	1.67	0|0|0	0.99	16.67	0.01
AIMP2	PSMB6	IPI00000811	0|2|3	5	1.67	0|0|0	0.99	16.67	0.01
AIMP2	NME1	IPI00012048	0|3|2	5	1.67	0|0|0	0.99	16.67	0.01
AIMP2	LDHB	IPI00219217	0|3|2	5	1.67	0|0|0	0.99	16.67	0.01
AIMP2	SAFB	IPI00300631	3|2|0	5	1.67	0|0|0	0.99	16.67	0.01
AIMP2	RHOT2	IPI00465059	0|3|2	5	1.67	0|0|0	0.99	16.67	0.01
AIMP2	YME1L1	IPI00045946	0|3|2	5	1.67	0|0|0	0.99	16.67	0.01
AIMP2	CHD3	IPI00002557	2|3|0	5	1.67	0|0|0	0.99	16.67	0.01
AIMP2	BAG6	IPI00465128	0|3|2	5	1.67	0|0|0	0.99	16.67	0.01
AIMP2	MON2	IPI00465246	0|3|2	5	1.67	0|0|0	0.99	16.67	0.01
AIMP2	HNRNPF	IPI00003881	2|0|2	4	1.33	0|0|0	0.98	13.33	0.02
AIMP2	LMTK2	IPI00217391	0|2|2	4	1.33	0|0|0	0.98	13.33	0.02
AIMP2	RPS5	IPI00008433	2|2|0	4	1.33	0|0|0	0.98	13.33	0.02
AIMP2	RPL32	IPI00395998	0|2|2	4	1.33	0|0|0	0.98	13.33	0.02
AIMP2	LIX1	IPI00296593	2|2|0	4	1.33	0|0|0	0.98	13.33	0.02
AIMP2	YWHAG	IPI00220642	0|2|2	4	1.33	0|0|0	0.98	13.33	0.02
AIMP2	GBP1	IPI00028564	0|2|2	4	1.33	0|0|0	0.98	13.33	0.02
AIMP2	TIMM23	IPI00007309	0|2|2	4	1.33	0|0|0	0.98	13.33	0.02
AIMP2	EIF4A1	IPI00025491	0|2|2	4	1.33	0|0|0	0.98	13.33	0.02
AIMP2	ACTR1A	IPI00029468	2|2|0	4	1.33	0|0|0	0.98	13.33	0.02
AIMP2	DNAJB6	IPI00024523	0|2|2	4	1.33	0|0|0	0.98	13.33	0.02
AIMP2	HDAC1	IPI00013774	0|2|2	4	1.33	0|0|0	0.98	13.33	0.02
AIMP2	FOXJ3	IPI00010426	0|2|2	4	1.33	0|0|0	0.98	13.33	0.02
AIMP2	ERLIN2	IPI00026942	0|4|7	11	3.67	0|0|2	0.95	5.5	0.05
AIMP2	CHCHD3	IPI00015833	0|4|6	10	3.33	0|0|2	0.94	5	0.06
AIMP2	YWHAE	IPI00000816	0|6|4	10	3.33	0|0|2	0.94	5	0.06
AIMP2	IPI01010194	IPI01010194	0|6|4	10	3.33	0|0|2	0.94	5	0.06
AIMP2	SLC25A12	IPI00386271	4|5|0	9	3	0|0|2	0.93	4.5	0.07
AIMP2	EEF1A1	IPI00396485	11|14|5	30	10	0|0|8	0.92	3.75	0.08
AIMP2	PARP1	IPI00449049	5|0|8	13	4.33	3|0|0	0.92	4.33	0.08
AIMP2	NPM1	IPI00220740	2|5|3	10	3.33	0|0|2	0.88	5	0.12
AIMP2	RPL23	IPI00010153	2|6|4	12	4	0|0|3	0.87	4	0.13
AIMP2	PSMA7	IPI00024175	0|6|4	10	3.33	0|0|3	0.87	3.33	0.13
AIMP2	RPS11	IPI00025091	2|4|3	9	3	0|0|2	0.86	4.5	0.14
AIMP2	PSMA6	IPI00029623	0|3|4	7	2.33	0|2|0	0.86	3.5	0.14
AIMP2	SNORA70	IPI00554723	0|4|3	7	2.33	0|0|2	0.86	3.5	0.14
AIMP2	HSP90AA4P	IPI00555957	0|10|6	16	5.33	0|3|3	0.85	2.67	0.15
AIMP2	CCT3	IPI00552715	4|6|5	15	5	0|0|4	0.85	3.75	0.15
AIMP2	RPS15A	IPI00221091	0|9|6	15	5	0|3|3	0.84	2.5	0.16
AIMP2	RPS7	IPI00013415	2|8|0	10	3.33	0|0|2	0.82	5	0.18
AIMP2	IPI00180730	IPI00180730	7|11|4	22	7.33	0|0|7	0.81	3.14	0.19
AIMP2	CHERP	IPI00333010	0|6|2	8	2.67	2|0|0	0.81	4	0.19
AIMP2	DHX9	IPI00844578	0|5|2	7	2.33	0|0|2	0.79	3.5	0.21
AIMP2	ACTB	IPI00021439	8|11|9	28	9.33	0|4|5	0.78	3.11	0.22
AIMP2	FLJ27420	IPI00442381	0|4|2	6	2	0|0|2	0.77	3	0.23
AIMP2	PSMA4	IPI00299155	0|2|3	5	1.67	0|0|2	0.72	2.5	0.28
AIMP2	CTTNBP2	IPI00103869	0|3|2	5	1.67	0|0|2	0.72	2.5	0.28
AIMP2	ILF2	IPI00005198	3|7|3	13	4.33	0|0|4	0.7	3.25	0.3
AIMP2	SNORD54	IPI00012493	2|4|4	10	3.33	0|0|4	0.7	2.5	0.3
AIMP2	HNRNPU	IPI00479217	7|6|7	20	6.67	0|3|4	0.69	2.86	0.31
AIMP2	IMMT	IPI00009960	2|6|2	10	3.33	0|0|3	0.68	3.33	0.32
AIMP2	RPL27	IPI00219155	2|6|0	8	2.67	0|0|3	0.68	2.67	0.32
AIMP2	CCT6A	IPI00027626	3|0|3	6	2	0|0|3	0.68	2	0.32
AIMP2	TRAP1	IPI00030275	3|5|3	11	3.67	4|0|0	0.65	2.75	0.35
AIMP2	RPL19	IPI00025329	0|2|2	4	1.33	0|0|2	0.64	2	0.36
AIMP2	DDX23	IPI00006725	2|2|0	4	1.33	0|0|2	0.64	2	0.36
AIMP2	RPS2	IPI00013485	5|9|7	21	7	3|0|5	0.63	2.62	0.37
AIMP2	EEF1D	IPI00023048	0|4|2	6	2	0|0|3	0.62	2	0.38
AIMP2	RPL15	IPI00470528	2|4|0	6	2	0|3|0	0.62	2	0.38
AIMP2	PRSS3	IPI00015614	7|0|12	19	6.33	9|0|0	0.61	2.11	0.39
AIMP2	IPI00017870	IPI00017870	0|4|5	9	3	0|5|0	0.61	1.8	0.39
AIMP2	RPS6	IPI00021840	2|4|3	9	3	0|0|4	0.59	2.25	0.41
AIMP2	HSPA1B	IPI00304925	27|85|58	170	56.67	0|25|28	0.57	3.21	0.43
AIMP2	RPL23A	IPI00021266	2|3|0	5	1.67	0|0|3	0.56	1.67	0.44
AIMP2	SF3B4	IPI00017339	0|3|2	5	1.67	0|3|0	0.56	1.67	0.44
AIMP2	XRCC6	IPI00644712	2|0|3	5	1.67	0|0|3	0.56	1.67	0.44
AIMP2	PCBP2	IPI00012066	3|5|4	12	4	0|2|3	0.55	2.4	0.45
AIMP2	RPS24	IPI00029750	0|7|3	10	3.33	0|2|3	0.55	2	0.45
AIMP2	CCT4	IPI00302927	2|4|9	15	5	2|3|2	0.52	2.14	0.48
AIMP2	RPL7A	IPI00299573	3|9|2	14	4.67	0|3|3	0.52	2.33	0.48
AIMP2	PHGDH	IPI00011200	8|13|8	29	9.67	4|4|4	0.51	2.42	0.49
AIMP2	HSPA1L	IPI00643152	18|57|32	107	35.67	9|20|19	0.5	2.23	0.5
AIMP2	TUBB4Q	IPI00018511	29|0|0	29	9.67	0|0|0	0.5	96.67	0.5
AIMP2	HSP90AB2P	IPI00455599	0|15|0	15	5	0|0|0	0.5	50	0.5
AIMP2	UBC	IPI01015985	0|14|0	14	4.67	0|0|0	0.5	46.67	0.5
AIMP2	MIS18A	IPI00021095	0|8|0	8	2.67	0|0|0	0.5	26.67	0.5
AIMP2	PGAM5	IPI00788907	0|7|0	7	2.33	0|0|0	0.5	23.33	0.5
AIMP2	PSMB2	IPI00028006	0|7|0	7	2.33	0|0|0	0.5	23.33	0.5
AIMP2	RPS27L	IPI00746004	0|0|7	7	2.33	0|0|0	0.5	23.33	0.5
AIMP2	DDB1	IPI00909008	0|7|0	7	2.33	0|0|0	0.5	23.33	0.5
AIMP2	RPS4Y1	IPI00302740	0|6|0	6	2	0|0|0	0.5	20	0.5
AIMP2	TUBA4B	IPI00017454	0|6|0	6	2	0|0|0	0.5	20	0.5
AIMP2	FAM125B	IPI00022918	6|0|0	6	2	0|0|0	0.5	20	0.5
AIMP2	IPI00847956	IPI00847956	0|0|6	6	2	0|0|0	0.5	20	0.5
AIMP2	SDCCAG8	IPI00334336	0|6|0	6	2	0|0|0	0.5	20	0.5
AIMP2	FGFR4	IPI00556393	0|6|0	6	2	0|0|0	0.5	20	0.5
AIMP2	SNORD21	IPI00000494	0|5|0	5	1.67	0|0|0	0.5	16.67	0.5
AIMP2	GNB3	IPI00029143	0|5|0	5	1.67	0|0|0	0.5	16.67	0.5
AIMP2	DNAJA4	IPI00465105	0|5|0	5	1.67	0|0|0	0.5	16.67	0.5
AIMP2	LRPPRC	IPI00783271	0|0|5	5	1.67	0|0|0	0.5	16.67	0.5
AIMP2	TRAF4	IPI00162088	0|4|0	4	1.33	0|0|0	0.5	13.33	0.5
AIMP2	HNRNPAB	IPI00334587	0|0|4	4	1.33	0|0|0	0.5	13.33	0.5
AIMP2	SSR1	IPI00301021	0|4|0	4	1.33	0|0|0	0.5	13.33	0.5
AIMP2	PRDX2	IPI00027350	0|4|0	4	1.33	0|0|0	0.5	13.33	0.5
AIMP2	RPL36	IPI00216237	0|4|0	4	1.33	0|0|0	0.5	13.33	0.5
AIMP2	PSMD6	IPI00793676	0|4|0	4	1.33	0|0|0	0.5	13.33	0.5
AIMP2	CACYBP	IPI00395627	0|4|0	4	1.33	0|0|0	0.5	13.33	0.5
AIMP2	HLA-H	IPI00004672	0|4|0	4	1.33	0|0|0	0.5	13.33	0.5
AIMP2	GNB2	IPI00003348	0|4|0	4	1.33	0|0|0	0.5	13.33	0.5
AIMP2	HNRNPK	IPI00216049	0|0|4	4	1.33	0|0|0	0.5	13.33	0.5
AIMP2	HLA-B	IPI00004657	0|4|0	4	1.33	0|0|0	0.5	13.33	0.5
AIMP2	DNAJC7	IPI00329629	0|4|0	4	1.33	0|0|0	0.5	13.33	0.5
AIMP2	CNGB3	IPI00409767	0|4|0	4	1.33	0|0|0	0.5	13.33	0.5
AIMP2	SCRIB	IPI00410666	4|0|0	4	1.33	0|0|0	0.5	13.33	0.5
AIMP2	PRKDC	IPI00296337	0|4|0	4	1.33	0|0|0	0.5	13.33	0.5
AIMP2	MTUS2	IPI00829933	0|3|0	3	1	0|0|0	0.5	10	0.5
AIMP2	ETV6	IPI00013159	3|0|0	3	1	0|0|0	0.5	10	0.5
AIMP2	RPL9	IPI00031691	0|3|0	3	1	0|0|0	0.5	10	0.5
AIMP2	C6orf97	IPI00216412	0|3|0	3	1	0|0|0	0.5	10	0.5
AIMP2	SNRPB2	IPI00029267	0|3|0	3	1	0|0|0	0.5	10	0.5
AIMP2	OSTCP1	IPI00183603	0|3|0	3	1	0|0|0	0.5	10	0.5
AIMP2	IPI00782963	IPI00782963	0|3|0	3	1	0|0|0	0.5	10	0.5
AIMP2	SLC25A10	IPI00015920	0|3|0	3	1	0|0|0	0.5	10	0.5
AIMP2	NTPCR	IPI00031570	0|3|0	3	1	0|0|0	0.5	10	0.5
AIMP2	ARF1	IPI00215914	0|3|0	3	1	0|0|0	0.5	10	0.5
AIMP2	HES2	IPI00001055	0|0|3	3	1	0|0|0	0.5	10	0.5
AIMP2	PSMB3	IPI00028004	0|3|0	3	1	0|0|0	0.5	10	0.5
AIMP2	HIST1H1T	IPI00419983	0|0|3	3	1	0|0|0	0.5	10	0.5
AIMP2	PPP2CA	IPI00008380	0|3|0	3	1	0|0|0	0.5	10	0.5
AIMP2	CASP8	IPI00000149	3|0|0	3	1	0|0|0	0.5	10	0.5
AIMP2	PSMD14	IPI00024821	0|3|0	3	1	0|0|0	0.5	10	0.5
AIMP2	SLC25A1	IPI00294159	0|0|3	3	1	0|0|0	0.5	10	0.5
AIMP2	ACOT8	IPI00298202	0|3|0	3	1	0|0|0	0.5	10	0.5
AIMP2	YBX1	IPI00031812	0|0|3	3	1	0|0|0	0.5	10	0.5
AIMP2	GAPDH	IPI00219018	0|3|0	3	1	0|0|0	0.5	10	0.5
AIMP2	SCO2	IPI00014458	0|3|0	3	1	0|0|0	0.5	10	0.5
AIMP2	HNRNPD	IPI00028888	0|0|3	3	1	0|0|0	0.5	10	0.5
AIMP2	MTFR1	IPI00910782	0|3|0	3	1	0|0|0	0.5	10	0.5
AIMP2	PSMD11	IPI00105598	0|3|0	3	1	0|0|0	0.5	10	0.5
AIMP2	CBWD2	IPI00216734	0|3|0	3	1	0|0|0	0.5	10	0.5
AIMP2	HSPBP1	IPI00100748	0|3|0	3	1	0|0|0	0.5	10	0.5
AIMP2	MAGED2	IPI00009542	0|3|0	3	1	0|0|0	0.5	10	0.5
AIMP2	GNAL	IPI00006395	0|0|3	3	1	0|0|0	0.5	10	0.5
AIMP2	RUVBL1	IPI00021187	0|3|0	3	1	0|0|0	0.5	10	0.5
AIMP2	CDK17	IPI00376955	0|3|0	3	1	0|0|0	0.5	10	0.5
AIMP2	PPP2R1A	IPI00168184	0|3|0	3	1	0|0|0	0.5	10	0.5
AIMP2	RAPGEF4	IPI00329560	0|3|0	3	1	0|0|0	0.5	10	0.5
AIMP2	FARSA	IPI00031820	3|0|0	3	1	0|0|0	0.5	10	0.5
AIMP2	HTATSF1	IPI00013788	0|3|0	3	1	0|0|0	0.5	10	0.5
AIMP2	DDOST	IPI00297084	0|0|3	3	1	0|0|0	0.5	10	0.5
AIMP2	CDC42BPA	IPI00550263	0|3|0	3	1	0|0|0	0.5	10	0.5
AIMP2	NUP93	IPI00397904	0|0|3	3	1	0|0|0	0.5	10	0.5
AIMP2	CAND1	IPI00100160	0|0|3	3	1	0|0|0	0.5	10	0.5
AIMP2	SUPT16H	IPI00026970	0|3|0	3	1	0|0|0	0.5	10	0.5
AIMP2	XPOT	IPI00306290	0|3|0	3	1	0|0|0	0.5	10	0.5
AIMP2	SPTBN1	IPI00005614	3|0|0	3	1	0|0|0	0.5	10	0.5
AIMP2	PSMD3	IPI00011603	0|0|12	12	4	0|0|4	0.49	3	0.51
AIMP2	SNORD43	IPI00550021	0|12|0	12	4	0|4|4	0.49	1.5	0.51
AIMP2	ACTBL2	IPI00003269	0|3|5	8	2.67	0|0|5	0.49	1.6	0.51
AIMP2	RPS26	IPI00655650	0|2|0	2	0.67	0|0|0	0.49	6.67	0.51
AIMP2	Conserved	IPI00983617	2|0|0	2	0.67	0|0|0	0.49	6.67	0.51
AIMP2	TPM1	IPI00018853	0|2|0	2	0.67	0|0|0	0.49	6.67	0.51
AIMP2	RPL35A	IPI00029731	0|2|0	2	0.67	0|0|0	0.49	6.67	0.51
AIMP2	PGAP2	IPI00442842	0|2|0	2	0.67	0|0|0	0.49	6.67	0.51
AIMP2	DTD1	IPI00152692	2|0|0	2	0.67	0|0|0	0.49	6.67	0.51
AIMP2	PSMC5	IPI00023919	0|0|2	2	0.67	0|0|0	0.49	6.67	0.51
AIMP2	PLCXD2	IPI00867633	0|2|0	2	0.67	0|0|0	0.49	6.67	0.51
AIMP2	RPL34	IPI00219160	2|0|0	2	0.67	0|0|0	0.49	6.67	0.51
AIMP2	IKBKG	IPI00002411	0|2|0	2	0.67	0|0|0	0.49	6.67	0.51
AIMP2	TXN	IPI00216298	0|2|0	2	0.67	0|0|0	0.49	6.67	0.51
AIMP2	MRGPRX3	IPI00984728	2|0|0	2	0.67	0|0|0	0.49	6.67	0.51
AIMP2	IPI00748962	IPI00748962	0|0|2	2	0.67	0|0|0	0.49	6.67	0.51
AIMP2	HIST1H2BD	IPI00152906	0|2|0	2	0.67	0|0|0	0.49	6.67	0.51
AIMP2	cDNA	IPI00922717	2|0|0	2	0.67	0|0|0	0.49	6.67	0.51
AIMP2	COG6	IPI01014154	0|2|0	2	0.67	0|0|0	0.49	6.67	0.51
AIMP2	TIMM13	IPI00001589	0|2|0	2	0.67	0|0|0	0.49	6.67	0.51
AIMP2	TMEM33	IPI00299084	2|0|0	2	0.67	0|0|0	0.49	6.67	0.51
AIMP2	USMG5	IPI00063903	0|2|0	2	0.67	0|0|0	0.49	6.67	0.51
AIMP2	RPLP2	IPI00008529	0|2|0	2	0.67	0|0|0	0.49	6.67	0.51
AIMP2	ACP1	IPI00219861	0|2|0	2	0.67	0|0|0	0.49	6.67	0.51
AIMP2	ALDH3A2	IPI00333619	2|0|0	2	0.67	0|0|0	0.49	6.67	0.51
AIMP2	SNRPB	IPI00329512	0|0|2	2	0.67	0|0|0	0.49	6.67	0.51
AIMP2	SGPL1	IPI00647291	0|2|0	2	0.67	0|0|0	0.49	6.67	0.51
AIMP2	ACLY	IPI00021290	0|2|0	2	0.67	0|0|0	0.49	6.67	0.51
AIMP2	C3orf56	IPI00167281	0|2|0	2	0.67	0|0|0	0.49	6.67	0.51
AIMP2	MAD2L1	IPI00012369	0|2|0	2	0.67	0|0|0	0.49	6.67	0.51
AIMP2	EBLN2	IPI00163601	0|2|0	2	0.67	0|0|0	0.49	6.67	0.51
AIMP2	PSMA5	IPI00291922	0|2|0	2	0.67	0|0|0	0.49	6.67	0.51
AIMP2	PPIB	IPI00646304	0|0|2	2	0.67	0|0|0	0.49	6.67	0.51
AIMP2	PSMA2	IPI00219622	0|2|0	2	0.67	0|0|0	0.49	6.67	0.51
AIMP2	FERMT1	IPI00304754	2|0|0	2	0.67	0|0|0	0.49	6.67	0.51
AIMP2	TRADD	IPI00018744	2|0|0	2	0.67	0|0|0	0.49	6.67	0.51
AIMP2	IPI00086909	IPI00086909	0|0|2	2	0.67	0|0|0	0.49	6.67	0.51
AIMP2	SCO1	IPI00027233	0|2|0	2	0.67	0|0|0	0.49	6.67	0.51
AIMP2	ATP1B3	IPI00008167	0|2|0	2	0.67	0|0|0	0.49	6.67	0.51
AIMP2	NDUFS3	IPI00025796	0|2|0	2	0.67	0|0|0	0.49	6.67	0.51
AIMP2	CDK4	IPI00007811	0|2|0	2	0.67	0|0|0	0.49	6.67	0.51
AIMP2	HNRNPC	IPI00216592	0|2|0	2	0.67	0|0|0	0.49	6.67	0.51
AIMP2	TECR	IPI00100656	0|2|0	2	0.67	0|0|0	0.49	6.67	0.51
AIMP2	PSMC6	IPI00926977	0|2|0	2	0.67	0|0|0	0.49	6.67	0.51
AIMP2	EPB41L2	IPI00015973	2|0|0	2	0.67	0|0|0	0.49	6.67	0.51
AIMP2	PSMC2	IPI00021435	0|0|2	2	0.67	0|0|0	0.49	6.67	0.51
AIMP2	SNRPA	IPI00012382	0|2|0	2	0.67	0|0|0	0.49	6.67	0.51
AIMP2	HLA-E	IPI00010362	0|2|0	2	0.67	0|0|0	0.49	6.67	0.51
AIMP2	WDR61	IPI00019269	0|0|2	2	0.67	0|0|0	0.49	6.67	0.51
AIMP2	LDHA	IPI00217966	0|2|0	2	0.67	0|0|0	0.49	6.67	0.51
AIMP2	PRMT1	IPI00382516	0|0|2	2	0.67	0|0|0	0.49	6.67	0.51
AIMP2	RFC3	IPI00031521	0|2|0	2	0.67	0|0|0	0.49	6.67	0.51
AIMP2	ATG16L2	IPI00300536	2|0|0	2	0.67	0|0|0	0.49	6.67	0.51
AIMP2	PSMD13	IPI00375380	0|2|0	2	0.67	0|0|0	0.49	6.67	0.51
AIMP2	HAT1	IPI00024719	0|2|0	2	0.67	0|0|0	0.49	6.67	0.51
AIMP2	LDHC	IPI00554498	0|2|0	2	0.67	0|0|0	0.49	6.67	0.51
AIMP2	DUX2	IPI00382872	2|0|0	2	0.67	0|0|0	0.49	6.67	0.51
AIMP2	PELO	IPI00106698	0|2|0	2	0.67	0|0|0	0.49	6.67	0.51
AIMP2	FKBP8	IPI00328161	0|2|0	2	0.67	0|0|0	0.49	6.67	0.51
AIMP2	HNRNPM	IPI00171903	0|2|0	2	0.67	0|0|0	0.49	6.67	0.51
AIMP2	OGDH	IPI00098902	2|0|0	2	0.67	0|0|0	0.49	6.67	0.51
AIMP2	SLC3A2	IPI00027493	0|2|0	2	0.67	0|0|0	0.49	6.67	0.51
AIMP2	DNAJA3	IPI00179187	0|2|0	2	0.67	0|0|0	0.49	6.67	0.51
AIMP2	XPNPEP3	IPI00550192	0|2|0	2	0.67	0|0|0	0.49	6.67	0.51
AIMP2	SLC1A5	IPI00019472	0|2|0	2	0.67	0|0|0	0.49	6.67	0.51
AIMP2	P4HB	IPI00010796	0|2|0	2	0.67	0|0|0	0.49	6.67	0.51
AIMP2	CCT6B	IPI00220656	2|0|0	2	0.67	0|0|0	0.49	6.67	0.51
AIMP2	FGR	IPI00016871	0|2|0	2	0.67	0|0|0	0.49	6.67	0.51
AIMP2	RARS2	IPI00549566	0|2|0	2	0.67	0|0|0	0.49	6.67	0.51
AIMP2	ATAD3B	IPI00045921	0|0|2	2	0.67	0|0|0	0.49	6.67	0.51
AIMP2	LOC100508736	IPI00895959	0|2|0	2	0.67	0|0|0	0.49	6.67	0.51
AIMP2	PPP2R1B	IPI00294178	0|0|2	2	0.67	0|0|0	0.49	6.67	0.51
AIMP2	YTHDF2	IPI00306043	2|0|0	2	0.67	0|0|0	0.49	6.67	0.51
AIMP2	LRRFIP2	IPI00007277	0|2|0	2	0.67	0|0|0	0.49	6.67	0.51
AIMP2	LYN	IPI00940936	0|2|0	2	0.67	0|0|0	0.49	6.67	0.51
AIMP2	SPG20	IPI00430622	2|0|0	2	0.67	0|0|0	0.49	6.67	0.51
AIMP2	RPGRIP1	IPI00179169	2|0|0	2	0.67	0|0|0	0.49	6.67	0.51
AIMP2	GPRASP2	IPI00069232	0|2|0	2	0.67	0|0|0	0.49	6.67	0.51
AIMP2	SENP5	IPI00063106	0|2|0	2	0.67	0|0|0	0.49	6.67	0.51
AIMP2	C10orf28	IPI00376196	0|2|0	2	0.67	0|0|0	0.49	6.67	0.51
AIMP2	GNAS	IPI00095891	0|0|2	2	0.67	0|0|0	0.49	6.67	0.51
AIMP2	CEP350	IPI00103595	2|0|0	2	0.67	0|0|0	0.49	6.67	0.51
AIMP2	DRP2	IPI00871834	0|2|0	2	0.67	0|0|0	0.49	6.67	0.51
AIMP2	ADAM19	IPI00941096	2|0|0	2	0.67	0|0|0	0.49	6.67	0.51
AIMP2	PSMD2	IPI00012268	0|0|2	2	0.67	0|0|0	0.49	6.67	0.51
AIMP2	UBE3B	IPI00470597	2|0|0	2	0.67	0|0|0	0.49	6.67	0.51
AIMP2	NEK4	IPI00021333	0|2|0	2	0.67	0|0|0	0.49	6.67	0.51
AIMP2	PSMD1	IPI00299608	2|0|0	2	0.67	0|0|0	0.49	6.67	0.51
AIMP2	IPO5	IPI00793443	0|0|2	2	0.67	0|0|0	0.49	6.67	0.51
AIMP2	XPO1	IPI00298961	2|0|0	2	0.67	0|0|0	0.49	6.67	0.51
AIMP2	REV1	IPI00008816	0|0|2	2	0.67	0|0|0	0.49	6.67	0.51
AIMP2	WDR6	IPI00013953	0|2|0	2	0.67	0|0|0	0.49	6.67	0.51
AIMP2	PLCB1	IPI00219563	2|0|0	2	0.67	0|0|0	0.49	6.67	0.51
AIMP2	CDK13	IPI00029162	0|2|0	2	0.67	0|0|0	0.49	6.67	0.51
AIMP2	CDK12	IPI00021175	0|2|0	2	0.67	0|0|0	0.49	6.67	0.51
AIMP2	CEP170	IPI00186194	0|2|0	2	0.67	0|0|0	0.49	6.67	0.51
AIMP2	BIVM-ERCC5	IPI00978010	0|2|0	2	0.67	0|0|0	0.49	6.67	0.51
AIMP2	LTN1	IPI00783835	0|2|0	2	0.67	0|0|0	0.49	6.67	0.51
AIMP2	AKD1	IPI00930224	0|2|0	2	0.67	0|0|0	0.49	6.67	0.51
AIMP2	DNAH2	IPI00651691	2|0|0	2	0.67	0|0|0	0.49	6.67	0.51
AIMP2	HEATR1	IPI00024279	0|2|0	2	0.67	0|0|0	0.49	6.67	0.51
AIMP2	VPS13C	IPI00412216	2|0|0	2	0.67	0|0|0	0.49	6.67	0.51
AIMP2	HSPD1	IPI00784154	12|7|8	27	9	3|4|5	0.48	2.25	0.52
AIMP2	RPL6	IPI00790342	0|5|0	5	1.67	0|0|2	0.48	2.5	0.52
AIMP2	TAOK3	IPI00410485	0|0|5	5	1.67	0|2|0	0.48	2.5	0.52
AIMP2	IPI00844513	IPI00844513	10|22|15	47	15.67	0|4|14	0.47	2.61	0.53
AIMP2	DDX46	IPI00329791	0|12|0	12	4	0|6|0	0.47	2	0.53
AIMP2	RPL28	IPI00182533	0|8|0	8	2.67	0|3|3	0.47	1.33	0.53
AIMP2	ATP5A1	IPI00440493	10|8|10	28	9.33	6|0|5	0.45	2.55	0.55
AIMP2	RBM25	IPI00004273	3|3|9	15	5	0|2|5	0.45	2.14	0.55
AIMP2	RPS13	IPI00221089	0|9|5	14	4.67	0|3|5	0.45	1.75	0.55
AIMP2	HNRNPA1	IPI00215965	0|4|0	4	1.33	0|2|0	0.45	2	0.55
AIMP2	RPS25	IPI00012750	0|4|0	4	1.33	0|0|2	0.45	2	0.55
AIMP2	HSPA2	IPI00007702	21|60|38	119	39.67	0|21|25	0.44	2.59	0.56
AIMP2	XRCC5	IPI00220834	0|0|5	5	1.67	0|0|3	0.44	1.67	0.56
AIMP2	EEF2	IPI00186290	3|5|2	10	3.33	0|2|3	0.43	2	0.57
AIMP2	PCBP1	IPI00016610	0|3|5	8	2.67	0|2|3	0.43	1.6	0.57
AIMP2	SNRPD3	IPI00017964	0|5|3	8	2.67	0|3|2	0.43	1.6	0.57
AIMP2	RPL35	IPI00412607	0|2|2	4	1.33	0|0|3	0.43	1.33	0.57
AIMP2	HSPA6	IPI00339269	18|49|35	102	34	7|18|20	0.42	2.27	0.58
AIMP2	RPS19	IPI00215780	4|0|4	8	2.67	0|2|3	0.41	1.6	0.59
AIMP2	CLTCL1	IPI00022881	0|0|5	5	1.67	0|4|0	0.41	1.25	0.59
AIMP2	CCT8	IPI00302925	0|0|3	3	1	0|0|2	0.4	1.5	0.6
AIMP2	SYNCRIP	IPI00018140	0|0|3	3	1	0|0|2	0.4	1.5	0.6
AIMP2	NCKAP1L	IPI00023407	3|0|0	3	1	0|2|0	0.4	1.5	0.6
AIMP2	TAOK1	IPI00002232	0|2|5	7	2.33	0|3|2	0.37	1.4	0.63
AIMP2	HSPA8	IPI00003865	41|107|69	217	72.33	12|30|45	0.36	2.49	0.64
AIMP2	SNRPD2	IPI00017963	0|4|0	4	1.33	0|0|4	0.35	1	0.65
AIMP2	RPL17	IPI00413324	0|7|3	10	3.33	0|2|5	0.34	1.43	0.66
AIMP2	RPS14	IPI00026271	4|7|5	16	5.33	2|3|3	0.32	2	0.68
AIMP2	RPS17	IPI00221093	0|10|4	14	4.67	0|4|6	0.32	1.4	0.68
AIMP2	RPL26L1	IPI00007144	0|5|4	9	3	0|2|4	0.32	1.5	0.68
AIMP2	CFL2	IPI00413344	0|0|2	2	0.67	0|0|2	0.32	1	0.68
AIMP2	CFL1	IPI00012011	0|0|2	2	0.67	0|2|0	0.32	1	0.68
AIMP2	GNB2L1	IPI00848226	0|0|2	2	0.67	0|0|2	0.32	1	0.68
AIMP2	IGF2BP1	IPI00008557	0|2|0	2	0.67	0|0|2	0.32	1	0.68
AIMP2	BAZ1B	IPI00069817	0|0|2	2	0.67	0|0|2	0.32	1	0.68
AIMP2	EEF1A2	IPI00014424	0|11|0	11	3.67	0|4|7	0.31	1	0.69
AIMP2	SHROOM3	IPI00152881	3|6|0	9	3	0|0|7	0.29	1.29	0.71
AIMP2	RPL24	IPI00306332	3|4|2	9	3	0|3|2	0.28	1.8	0.72
AIMP2	DLST	IPI00033034	5|0|0	5	1.67	6|0|0	0.26	0.83	0.74
AIMP2	RPL12	IPI00024933	6|9|6	21	7	0|4|6	0.25	2.1	0.75
AIMP2	PRPF40A	IPI00337385	0|4|7	11	3.67	0|2|6	0.25	1.38	0.75
AIMP2	RPL11	IPI00376798	4|8|3	15	5	0|2|7	0.24	1.67	0.76
AIMP2	RPS9	IPI00221088	3|8|4	15	5	0|2|7	0.24	1.67	0.76
AIMP2	PRDX1	IPI00000874	3|6|2	11	3.67	0|3|4	0.24	1.57	0.76
AIMP2	RPS8	IPI00216587	4|9|5	18	6	0|4|6	0.23	1.8	0.77
AIMP2	SNORD32A	IPI00304612	3|8|3	14	4.67	0|4|5	0.23	1.56	0.77
AIMP2	TCP1	IPI00290566	4|2|5	11	3.67	0|0|7	0.23	1.57	0.77
AIMP2	IPI00397701	IPI00397701	2|3|2	7	2.33	0|2|2	0.23	1.75	0.77
AIMP2	HIST1H1C	IPI00217465	0|0|2	2	0.67	3|0|0	0.22	0.67	0.78
AIMP2	PDHX	IPI00298423	0|0|2	2	0.67	0|3|0	0.22	0.67	0.78
AIMP2	SF3B14	IPI00032827	0|4|0	4	1.33	0|2|3	0.2	0.8	0.8
AIMP2	PHB2	IPI00027252	9|11|7	27	9	0|5|8	0.15	2.08	0.85
AIMP2	RPL14	IPI00555744	3|5|7	15	5	0|4|5	0.14	1.67	0.86
AIMP2	SF3B1	IPI00026089	0|37|22	59	19.67	2|20|14	0.11	1.64	0.89
AIMP2	SF3A2	IPI00017341	0|14|7	21	7	3|5|9	0.11	1.24	0.89
AIMP2	RPL30	IPI00219156	2|5|0	7	2.33	0|4|3	0.11	1	0.89
AIMP2	HSPA4	IPI00002966	0|2|2	4	1.33	0|2|2	0.11	1	0.89
AIMP2	MIF	IPI00293276	0|0|2	2	0.67	0|0|4	0.11	0.5	0.89
AIMP2	CCT5	IPI00010720	0|2|3	5	1.67	0|2|3	0.1	1	0.9
AIMP2	ABI1	IPI00431025	4|9|6	19	6.33	3|4|5	0.09	1.58	0.91
AIMP2	AHSA1	IPI00030706	2|8|7	17	5.67	0|4|7	0.09	1.55	0.91
AIMP2	PHF5A	IPI00005511	0|3|0	3	1	0|2|3	0.08	0.6	0.92
AIMP2	RPL8	IPI00012772	2|7|3	12	4	3|4|3	0.06	1.2	0.94
AIMP2	RPL22	IPI00219153	0|4|3	7	2.33	0|2|5	0.06	1	0.94
AIMP2	RPL31	IPI00026302	0|2|0	2	0.67	2|0|2	0.06	0.5	0.94
AIMP2	DHX15	IPI00396435	0|2|0	2	0.67	0|2|2	0.06	0.5	0.94
AIMP2	EEF1G	IPI00000875	3|7|7	17	5.67	0|3|8	0.05	1.55	0.95
AIMP2	DLAT	IPI00021338	6|13|6	25	8.33	3|5|9	0.04	1.47	0.96
AIMP2	RPS16	IPI00221092	8|12|4	24	8	2|7|7	0.04	1.5	0.96
AIMP2	PHB	IPI00017334	2|4|4	10	3.33	0|3|5	0.03	1.25	0.97
AIMP2	RPL18A	IPI00026202	0|3|2	5	1.67	0|2|4	0.03	0.83	0.97
AIMP2	PABPC1L	IPI00556259	0|0|3	3	1	2|0|4	0.03	0.5	0.97
AIMP2	HSPA5	IPI00003362	0|18|13	31	10.33	8|7|9	0.02	1.29	0.98
AIMP2	GFAP	IPI00025363	0|9|0	9	3	0|0|14	0.02	0.64	0.98
AIMP2	RPL10A	IPI00412579	3|3|2	8	2.67	0|4|3	0.02	1.14	0.98
AIMP2	EIF3L	IPI00465233	2|0|3	5	1.67	0|0|7	0.02	0.71	0.98
AIMP2	RPL21	IPI00247583	0|2|0	2	0.67	0|2|3	0.02	0.4	0.98
AIMP2	ATXN2L	IPI00456359	0|0|2	2	0.67	0|3|2	0.02	0.4	0.98
AIMP2	RPS3	IPI00011253	9|8|11	28	9.33	3|6|8	0.01	1.65	0.99
AIMP2	RPLP0	IPI00008530	9|9|5	23	7.67	5|5|5	0.01	1.53	0.99
AIMP2	RPS4Y2	IPI00219894	0|4|0	4	1.33	0|3|6	0.01	0.44	0.99
AIMP2	DBT	IPI00003944	139|122|91	352	117.33	132|162|128	0	0.83	1
AIMP2	SF3A1	IPI00017451	23|49|81	153	51	15|38|60	0	1.35	1
AIMP2	CYFIP1	IPI00644231	28|64|50	142	47.33	30|54|57	0	1.01	1
AIMP2	NCKAP1	IPI00031982	27|51|52	130	43.33	25|39|39	0	1.26	1
AIMP2	CKAP4	IPI00141318	2|50|47	99	33	3|39|60	0	0.97	1
AIMP2	CYFIP2	IPI00719600	17|41|34	92	30.67	24|36|40	0	0.92	1
AIMP2	SF3B3	IPI00300371	6|34|21	61	20.33	7|21|25	0	1.15	1
AIMP2	IPI01025580	IPI01025580	18|16|24	58	19.33	27|27|39	0	0.62	1
AIMP2	SF3A3	IPI00029764	10|19|15	44	14.67	5|17|18	0	1.1	1
AIMP2	SNORD73A	IPI00419880	10|13|10	33	11	2|11|10	0	1.43	1
AIMP2	LOC728638	IPI00787323	13|9|8	30	10	0|12|17	0	1.03	1
AIMP2	RPS18	IPI00013296	3|14|11	28	9.33	2|9|11	0	1.27	1
AIMP2	CLTC	IPI00024067	4|9|15	28	9.33	3|12|20	0	0.8	1
AIMP2	PDHA1	IPI00306301	6|11|11	28	9.33	4|10|17	0	0.9	1
AIMP2	PDHB	IPI00003925	6|12|9	27	9	8|8|10	0	1.04	1
AIMP2	WASF2	IPI00472164	6|9|10	25	8.33	6|7|9	0	1.14	1
AIMP2	SF3B2	IPI00221106	3|9|10	22	7.33	3|12|9	0	0.92	1
AIMP2	BCKDHA	IPI00025100	9|2|10	21	7	10|6|10	0	0.81	1
AIMP2	RPL18	IPI00215719	5|10|4	19	6.33	3|6|8	0	1.12	1
AIMP2	RPS4X	IPI00217030	3|9|5	17	5.67	3|5|8	0	1.06	1
AIMP2	DLD	IPI00015911	9|3|4	16	5.33	6|10|11	0	0.59	1
AIMP2	PCMT1	IPI00411680	0|7|8	15	5	0|4|12	0	0.94	1
AIMP2	RPL7P32	IPI00030179	3|8|2	13	4.33	2|8|4	0	0.93	1
AIMP2	HSPA9	IPI00007765	4|5|2	11	3.67	5|4|2	0	1	1
AIMP2	RPL13	IPI00465361	2|6|2	10	3.33	0|4|8	0	0.83	1
AIMP2	PABPC1	IPI00008524	5|0|4	9	3	2|5|15	0	0.41	1
AIMP2	BCKDHB	IPI00011276	2|2|3	7	2.33	5|2|4	0	0.64	1
AIMP2	CCT2	IPI00297779	2|2|2	6	2	3|0|3	0	1	1
AIMP2	PABPC4	IPI00012726	0|0|2	2	0.67	2|2|5	0	0.22	1
Spec1 ; the number of spectra in three replicates
SpecSum2 ; sum of spectra in three replicates
AvgSpec3 ; the average number of spectra in three replicates
ctrlCounts4 ; the number of spectra acquired in three replicates of Mock
SaintScore5 ; score acquired by SAINTexpress
FoldChange6
BFDR7

## Sheet: KARS
Table S1. C - Identified proteins from KARS precipitates in HEK293T cells and their SAINT probabilities.
Bait	Prey	PreyGene	Spec1	SpecSum2	AvgSpec3	ctrlCounts4	SaintScore5	FoldChange6	BFDR7
KARS	EPRS	IPI00013452	1062|1124|1134	3320	1106.67	2|0|8	1	332	0
KARS	KARS	IPI00014238	940|778|883	2601	867	0|0|4	1	650.25	0
KARS	IARS	IPI00644127	555|544|578	1677	559	2|2|5	1	186.33	0
KARS	DARS	IPI00216951	532|425|444	1401	467	3|3|8	1	100.07	0
KARS	QARS	IPI00925046	479|478|421	1378	459.33	0|0|4	1	344.5	0
KARS	RARS	IPI00004860	400|362|397	1159	386.33	0|0|3	1	386.33	0
KARS	LARS	IPI00103994	336|407|320	1063	354.33	0|0|0	1	3543.33	0
KARS	MARS	IPI00008240	266|334|299	899	299.67	0|0|0	1	2996.67	0
KARS	AIMP1	IPI00006252	185|213|276	674	224.67	0|0|0	1	2246.67	0
KARS	AIMP1_b	IPI00793201	181|212|272	665	221.67	0|0|0	1	2216.67	0
KARS	AIMP2	IPI00011916	134|187|217	538	179.33	0|0|0	1	1793.33	0
KARS	AIMP2_DX2	IPI00893993	102|142|174	418	139.33	0|0|0	1	1393.33	0
KARS	EEF1E1	IPI00003588	64|138|156	358	119.33	0|0|0	1	1193.33	0
KARS	TARS	IPI00329633	44|41|32	117	39	0|0|0	1	390	0
KARS	TARSL2	IPI00328082	43|44|30	117	39	0|0|0	1	390	0
KARS	SLC25A5	IPI00007188	16|23|31	70	23.33	2|3|6	1	6.36	0
KARS	SLC25A4	IPI00022891	11|17|23	51	17	0|3|0	1	17	0
KARS	RPL4	IPI00003918	19|18|6	43	14.33	3|4|2	1	4.78	0
KARS	TTN	IPI00940872	27|0|14	41	13.67	0|0|0	1	136.67	0
KARS	RPS4Y1	IPI00302740	8|14|10	32	10.67	0|0|0	1	106.67	0
KARS	IPI00174849	IPI00174849	15|0|14	29	9.67	0|0|0	1	96.67	0
KARS	SNORA70	IPI00554723	6|14|8	28	9.33	0|0|2	1	14	0
KARS	RPS11	IPI00025091	8|12|5	25	8.33	0|0|2	1	12.5	0
KARS	TMC7	IPI00375845	13|4|6	23	7.67	0|0|0	1	76.67	0
KARS	MTUS2	IPI00829933	5|7|7	19	6.33	0|0|0	1	63.33	0
KARS	RPS27A	IPI00179330	3|8|5	16	5.33	0|0|0	1	53.33	0
KARS	LMTK2	IPI00217391	4|6|5	15	5	0|0|0	1	50	0
KARS	RPS23	IPI00218606	6|5|4	15	5	0|0|0	1	50	0
KARS	C6orf97	IPI00216412	0|7|8	15	5	0|0|0	1	50	0
KARS	LMNB2	IPI00009771	6|4|4	14	4.67	0|0|0	1	46.67	0
KARS	HNRNPF	IPI00003881	8|2|4	14	4.67	0|0|0	1	46.67	0
KARS	RPL10L	IPI00064765	0|8|6	14	4.67	0|0|0	1	46.67	0
KARS	ATP8A2	IPI00465166	4|4|3	11	3.67	0|0|0	1	36.67	0
KARS	RPS26	IPI00655650	2|6|3	11	3.67	0|0|0	1	36.67	0
KARS	SLC25A3	IPI00022202	2|5|4	11	3.67	0|0|0	1	36.67	0
KARS	NF1	IPI00299512	3|8|0	11	3.67	0|0|0	1	36.67	0
KARS	C3orf77	IPI00885176	2|4|4	10	3.33	0|0|0	1	33.33	0
KARS	RPS12	IPI00013917	0|5|5	10	3.33	0|0|0	1	33.33	0
KARS	POTEF	IPI00739539	5|5|0	10	3.33	0|0|0	1	33.33	0
KARS	SLC25A11	IPI00219729	2|3|4	9	3	0|0|0	1	30	0
KARS	SNRPA1	IPI00297477	0|5|4	9	3	0|0|0	1	30	0
KARS	ETV6	IPI00013159	6|3|0	9	3	0|0|0	1	30	0
KARS	Conserved	IPI00983617	6|3|0	9	3	0|0|0	1	30	0
KARS	SAFB	IPI00300631	5|0|4	9	3	0|0|0	1	30	0
KARS	C10orf27	IPI00065315	2|3|3	8	2.67	0|0|0	1	26.67	0
KARS	ZEB1	IPI00375505	3|2|3	8	2.67	0|0|0	1	26.67	0
KARS	KIAA1009	IPI00007122	3|3|2	8	2.67	0|0|0	1	26.67	0
KARS	LIX1	IPI00296593	3|5|0	8	2.67	0|0|0	1	26.67	0
KARS	CEP350	IPI00103595	0|4|4	8	2.67	0|0|0	1	26.67	0
KARS	ATP5C1	IPI00395769	4|0|3	7	2.33	0|0|0	1	23.33	0
KARS	BCMO1	IPI00307216	0|3|4	7	2.33	0|0|0	1	23.33	0
KARS	STAT1	IPI00030781	0|3|4	7	2.33	0|0|0	1	23.33	0
KARS	PXDN	IPI00016112	0|3|4	7	2.33	0|0|0	1	23.33	0
KARS	BIVM	IPI00158804	3|0|3	6	2	0|0|0	1	20	0
KARS	ACLY	IPI00021290	3|3|0	6	2	0|0|0	1	20	0
KARS	ECT2	IPI00748143	3|0|3	6	2	0|0|0	1	20	0
KARS	SLC25A6	IPI00291467	12|19|25	56	18.67	0|2|7	0.99	6.22	0.01
KARS	RPL7A	IPI00299573	6|16|10	32	10.67	0|3|3	0.99	5.33	0.01
KARS	GBP1	IPI00028564	6|2|0	8	2.67	0|0|0	0.99	26.67	0.01
KARS	RPS5	IPI00008433	0|5|2	7	2.33	0|0|0	0.99	23.33	0.01
KARS	RPL32	IPI00395998	0|5|2	7	2.33	0|0|0	0.99	23.33	0.01
KARS	IPI00749373	IPI00749373	5|0|2	7	2.33	0|0|0	0.99	23.33	0.01
KARS	TUBA4B	IPI00017454	0|2|5	7	2.33	0|0|0	0.99	23.33	0.01
KARS	HSD17B10	IPI00017726	0|5|2	7	2.33	0|0|0	0.99	23.33	0.01
KARS	PSMC5	IPI00023919	0|2|4	6	2	0|0|0	0.99	20	0.01
KARS	EPB41L2	IPI00015973	0|4|2	6	2	0|0|0	0.99	20	0.01
KARS	RPL27A	IPI00456758	0|2|3	5	1.67	0|0|0	0.99	16.67	0.01
KARS	ERLIN1	IPI00007940	3|0|2	5	1.67	0|0|0	0.99	16.67	0.01
KARS	TPM1	IPI00018853	2|3|0	5	1.67	0|0|0	0.99	16.67	0.01
KARS	OLFM3	IPI00219998	3|2|0	5	1.67	0|0|0	0.99	16.67	0.01
KARS	CXorf24	IPI00382795	0|2|3	5	1.67	0|0|0	0.99	16.67	0.01
KARS	IKBKG	IPI00002411	0|3|2	5	1.67	0|0|0	0.99	16.67	0.01
KARS	IPI00169058	IPI00169058	0|3|2	5	1.67	0|0|0	0.99	16.67	0.01
KARS	OR4D2	IPI00011052	0|3|2	5	1.67	0|0|0	0.99	16.67	0.01
KARS	OFD1	IPI00026580	0|3|2	5	1.67	0|0|0	0.99	16.67	0.01
KARS	RPS2	IPI00013485	13|15|13	41	13.67	3|0|5	0.98	5.12	0.02
KARS	RPS7	IPI00013415	3|8|6	17	5.67	0|0|2	0.98	8.5	0.02
KARS	IPI01022062	IPI01022062	2|2|2	6	2	0|0|0	0.98	20	0.02
KARS	PGAP2	IPI00442842	2|2|0	4	1.33	0|0|0	0.98	13.33	0.02
KARS	RPL29	IPI00419919	0|2|2	4	1.33	0|0|0	0.98	13.33	0.02
KARS	GNG10	IPI00030059	0|2|2	4	1.33	0|0|0	0.98	13.33	0.02
KARS	PLCXD2	IPI00867633	2|2|0	4	1.33	0|0|0	0.98	13.33	0.02
KARS	TRAF4	IPI00162088	2|2|0	4	1.33	0|0|0	0.98	13.33	0.02
KARS	ZNF830	IPI00043565	0|2|2	4	1.33	0|0|0	0.98	13.33	0.02
KARS	CCDC147	IPI00174574	0|2|2	4	1.33	0|0|0	0.98	13.33	0.02
KARS	LIG1	IPI00219841	0|2|2	4	1.33	0|0|0	0.98	13.33	0.02
KARS	UBR2	IPI00217407	2|2|0	4	1.33	0|0|0	0.98	13.33	0.02
KARS	MYLK	IPI00221255	2|0|2	4	1.33	0|0|0	0.98	13.33	0.02
KARS	TUBB4	IPI00023598	32|19|28	79	26.33	16|0|0	0.96	4.94	0.04
KARS	TUBA1B	IPI00930688	21|16|21	58	19.33	0|11|0	0.96	5.27	0.04
KARS	RPL23	IPI00010153	7|9|5	21	7	0|0|3	0.96	7	0.04
KARS	RPS25	IPI00012750	0|5|5	10	3.33	0|0|2	0.95	5	0.05
KARS	RPS6	IPI00021840	8|9|6	23	7.67	0|0|4	0.94	5.75	0.06
KARS	RPS15A	IPI00221091	4|8|8	20	6.67	0|3|3	0.94	3.33	0.06
KARS	TNIK	IPI00145805	0|6|4	10	3.33	0|0|2	0.94	5	0.06
KARS	EEF1A1	IPI00396485	13|8|12	33	11	0|0|8	0.92	4.12	0.08
KARS	TUBA1A	IPI00180675	18|15|0	33	11	0|11|0	0.92	3	0.08
KARS	RPL23A	IPI00021266	0|6|6	12	4	0|0|3	0.92	4	0.08
KARS	RPL27	IPI00219155	0|7|5	12	4	0|0|3	0.91	4	0.09
KARS	RPL6	IPI00790342	3|12|2	17	5.67	0|0|2	0.9	8.5	0.1
KARS	PRDX4	IPI00011937	4|4|0	8	2.67	0|0|2	0.9	4	0.1
KARS	RPS8	IPI00216587	8|17|11	36	12	0|4|6	0.88	3.6	0.12
KARS	IPI00180730	IPI00180730	11|7|9	27	9	0|0|7	0.88	3.86	0.12
KARS	RPS27	IPI00397358	3|4|3	10	3.33	0|0|2	0.85	5	0.15
KARS	RPL10A	IPI00412579	7|11|2	20	6.67	0|4|3	0.83	2.86	0.17
KARS	RPL15	IPI00470528	2|10|3	15	5	0|3|0	0.83	5	0.17
KARS	RPL7P32	IPI00030179	14|16|14	44	14.67	2|8|4	0.82	3.14	0.18
KARS	RPL18A	IPI00026202	6|11|5	22	7.33	0|2|4	0.82	3.67	0.18
KARS	RPL14	IPI00555744	4|13|9	26	8.67	0|4|5	0.81	2.89	0.19
KARS	SNORD54	IPI00012493	3|5|5	13	4.33	0|0|4	0.81	3.25	0.19
KARS	RPL12	IPI00024933	10|14|10	34	11.33	0|4|6	0.79	3.4	0.21
KARS	HSP90AB1	IPI00414676	0|14|11	25	8.33	0|5|6	0.77	2.27	0.23
KARS	PCBP2	IPI00012066	2|6|5	13	4.33	0|2|3	0.77	2.6	0.23
KARS	NPM1	IPI00220740	2|3|2	7	2.33	0|0|2	0.71	3.5	0.29
KARS	CFL1	IPI00012011	3|2|0	5	1.67	0|2|0	0.71	2.5	0.29
KARS	CTTNBP2	IPI00103869	0|2|3	5	1.67	0|0|2	0.71	2.5	0.29
KARS	RPS9	IPI00221088	5|15|8	28	9.33	0|2|7	0.7	3.11	0.3
KARS	RPL28	IPI00182533	0|9|5	14	4.67	0|3|3	0.7	2.33	0.3
KARS	RPL24	IPI00306332	4|5|5	14	4.67	0|3|2	0.68	2.8	0.32
KARS	PCBP1	IPI00016610	0|5|5	10	3.33	0|2|3	0.68	2	0.32
KARS	RPS13	IPI00221089	6|10|7	23	7.67	0|3|5	0.67	2.88	0.33
KARS	RPS24	IPI00029750	4|7|4	15	5	0|2|3	0.67	3	0.33
KARS	ILF2	IPI00005198	2|6|3	11	3.67	0|0|4	0.67	2.75	0.33
KARS	RPL21	IPI00247583	0|4|7	11	3.67	0|2|3	0.67	2.2	0.33
KARS	IMMT	IPI00009960	5|2|0	7	2.33	0|0|3	0.65	2.33	0.35
KARS	DNAJA1	IPI00012535	2|0|2	4	1.33	0|0|2	0.63	2	0.37
KARS	SNORD43	IPI00550021	5|10|6	21	7	0|4|4	0.57	2.62	0.43
KARS	RPS4X	IPI00217030	10|17|12	39	13	3|5|8	0.55	2.44	0.45
KARS	RPL11	IPI00376798	8|9|7	24	8	0|2|7	0.54	2.67	0.46
KARS	RPS17	IPI00221093	4|10|9	23	7.67	0|4|6	0.54	2.3	0.46
KARS	RPL26L1	IPI00007144	5|0|6	11	3.67	0|2|4	0.54	1.83	0.46
KARS	EEF1D	IPI00023048	0|3|2	5	1.67	0|0|3	0.54	1.67	0.46
KARS	RPL35	IPI00412607	0|3|2	5	1.67	0|0|3	0.54	1.67	0.46
KARS	SNRPD2	IPI00017963	0|5|2	7	2.33	0|0|4	0.51	1.75	0.49
KARS	TRAP1	IPI00030275	0|2|5	7	2.33	4|0|0	0.51	1.75	0.49
KARS	SNORD21	IPI00000494	0|15|0	15	5	0|0|0	0.5	50	0.5
KARS	TUBA3E	IPI00410402	0|0|14	14	4.67	0|0|0	0.5	46.67	0.5
KARS	RPL9	IPI00031691	0|11|0	11	3.67	0|0|0	0.5	36.67	0.5
KARS	NCL	IPI00604620	11|0|0	11	3.67	0|0|0	0.5	36.67	0.5
KARS	TUBB4Q	IPI00018511	10|0|0	10	3.33	0|0|0	0.5	33.33	0.5
KARS	RPL26	IPI00027270	0|8|0	8	2.67	0|0|0	0.5	26.67	0.5
KARS	ENO3	IPI00218474	8|0|0	8	2.67	0|2|0	0.5	4	0.5
KARS	SLC25A31	IPI00010420	0|0|7	7	2.33	0|0|0	0.5	23.33	0.5
KARS	DOCK10	IPI00333770	0|7|0	7	2.33	0|0|0	0.5	23.33	0.5
KARS	HNRNPH1	IPI00013881	6|0|0	6	2	0|0|0	0.5	20	0.5
KARS	IPI00062151	IPI00062151	0|6|0	6	2	0|0|0	0.5	20	0.5
KARS	ATG16L1	IPI00470446	0|0|6	6	2	0|0|0	0.5	20	0.5
KARS	EFCAB5	IPI00791236	0|6|0	6	2	0|0|0	0.5	20	0.5
KARS	DNAH2	IPI00651691	6|0|0	6	2	0|0|0	0.5	20	0.5
KARS	EMD	IPI00032003	0|0|5	5	1.67	0|0|0	0.5	16.67	0.5
KARS	ARID4A	IPI00879032	5|0|0	5	1.67	0|0|0	0.5	16.67	0.5
KARS	IPI00847956	IPI00847956	0|5|0	5	1.67	0|0|0	0.5	16.67	0.5
KARS	SDCBP	IPI00299086	0|5|0	5	1.67	0|0|0	0.5	16.67	0.5
KARS	CGN	IPI00844508	0|0|5	5	1.67	0|0|0	0.5	16.67	0.5
KARS	IQGAP3	IPI00328905	0|0|5	5	1.67	0|0|0	0.5	16.67	0.5
KARS	FAM125B	IPI00022918	4|0|0	4	1.33	0|0|0	0.5	13.33	0.5
KARS	DTD1	IPI00152692	4|0|0	4	1.33	0|0|0	0.5	13.33	0.5
KARS	MRGPRX3	IPI00984728	4|0|0	4	1.33	0|0|0	0.5	13.33	0.5
KARS	SRP14	IPI00293434	0|4|0	4	1.33	0|0|0	0.5	13.33	0.5
KARS	IPI00844321	IPI00844321	0|4|0	4	1.33	0|0|0	0.5	13.33	0.5
KARS	ALDH3A2	IPI00333619	4|0|0	4	1.33	0|0|0	0.5	13.33	0.5
KARS	ACTR2	IPI00005159	0|4|0	4	1.33	0|0|0	0.5	13.33	0.5
KARS	RCE1	IPI00031755	0|0|4	4	1.33	0|0|0	0.5	13.33	0.5
KARS	ATG16L2	IPI00300536	0|0|4	4	1.33	0|0|0	0.5	13.33	0.5
KARS	PHKG1	IPI00220396	4|0|0	4	1.33	0|0|0	0.5	13.33	0.5
KARS	FERMT1	IPI00304754	4|0|0	4	1.33	0|0|0	0.5	13.33	0.5
KARS	ARFGAP3	IPI00299263	4|0|0	4	1.33	0|0|0	0.5	13.33	0.5
KARS	DUX2	IPI00382872	4|0|0	4	1.33	0|0|0	0.5	13.33	0.5
KARS	WDFY4	IPI00472883	0|0|4	4	1.33	0|0|0	0.5	13.33	0.5
KARS	DDX41	IPI00007208	0|4|0	4	1.33	0|0|0	0.5	13.33	0.5
KARS	RPGRIP1	IPI00179169	0|4|0	4	1.33	0|0|0	0.5	13.33	0.5
KARS	GPR124	IPI00292834	0|4|0	4	1.33	0|0|0	0.5	13.33	0.5
KARS	SAFB2	IPI00005648	0|0|4	4	1.33	0|0|0	0.5	13.33	0.5
KARS	MGA	IPI00741005	4|0|0	4	1.33	0|0|0	0.5	13.33	0.5
KARS	DNHD1	IPI00936051	0|4|0	4	1.33	0|0|0	0.5	13.33	0.5
KARS	TG	IPI00985038	3|0|0	3	1	0|0|0	0.5	10	0.5
KARS	LDHB	IPI00219217	0|3|0	3	1	0|0|0	0.5	10	0.5
KARS	IPI00748962	IPI00748962	0|0|3	3	1	0|0|0	0.5	10	0.5
KARS	HIST2H2BE	IPI00003935	0|0|3	3	1	0|0|0	0.5	10	0.5
KARS	HNRNPAB	IPI00334587	0|3|0	3	1	0|0|0	0.5	10	0.5
KARS	HIST1H2BM	IPI00554798	0|0|3	3	1	0|0|0	0.5	10	0.5
KARS	TXNDC8	IPI00160585	3|0|0	3	1	0|0|0	0.5	10	0.5
KARS	IPI00921234	IPI00921234	0|3|0	3	1	0|0|0	0.5	10	0.5
KARS	RPL13AP3	IPI00432865	0|0|3	3	1	0|0|0	0.5	10	0.5
KARS	BPIFA1	IPI00009856	0|3|0	3	1	0|0|0	0.5	10	0.5
KARS	RNF24	IPI00910656	3|0|0	3	1	0|0|0	0.5	10	0.5
KARS	CASP8	IPI00000149	0|0|3	3	1	0|0|0	0.5	10	0.5
KARS	PSMC6	IPI00926977	0|0|3	3	1	0|0|0	0.5	10	0.5
KARS	SDCCAG8	IPI00334336	0|0|3	3	1	0|0|0	0.5	10	0.5
KARS	hypothetical	IPI00457055	0|0|3	3	1	0|0|0	0.5	10	0.5
KARS	BCO2	IPI00412161	3|0|0	3	1	0|0|0	0.5	10	0.5
KARS	RAPGEF4	IPI00329560	0|3|0	3	1	0|0|0	0.5	10	0.5
KARS	CEP57L1P1	IPI00217914	3|0|0	3	1	0|0|0	0.5	10	0.5
KARS	OGDH	IPI00098902	3|0|0	3	1	0|0|0	0.5	10	0.5
KARS	ZNF263	IPI00298951	0|3|0	3	1	0|0|0	0.5	10	0.5
KARS	OGDHL	IPI00643720	3|0|0	3	1	0|0|0	0.5	10	0.5
KARS	ZNF225	IPI00007035	0|3|0	3	1	0|0|0	0.5	10	0.5
KARS	CDC42BPA	IPI00550263	0|0|3	3	1	0|0|0	0.5	10	0.5
KARS	WHAMM	IPI00797568	0|0|3	3	1	0|0|0	0.5	10	0.5
KARS	TBC1D30	IPI00180403	3|0|0	3	1	0|0|0	0.5	10	0.5
KARS	TBC1D4	IPI00926241	0|0|3	3	1	0|0|0	0.5	10	0.5
KARS	IGSF9B	IPI00847471	0|0|3	3	1	0|0|0	0.5	10	0.5
KARS	RB1CC1	IPI00783392	0|3|0	3	1	0|0|0	0.5	10	0.5
KARS	CENPF	IPI00855998	0|0|3	3	1	0|0|0	0.5	10	0.5
KARS	TUBB6	IPI00646779	18|15|21	54	18	7|7|9	0.49	2.35	0.51
KARS	HSP90AB3P	IPI00555614	0|0|11	11	3.67	0|0|3	0.49	3.67	0.51
KARS	CHCHD3	IPI00015833	0|0|6	6	2	0|0|2	0.49	3	0.51
KARS	ENO1	IPI00465248	6|0|0	6	2	0|2|2	0.49	1.5	0.51
KARS	VDAC2	IPI00024145	0|0|2	2	0.67	0|0|0	0.49	6.67	0.51
KARS	TUFM	IPI00027107	2|0|0	2	0.67	0|0|0	0.49	6.67	0.51
KARS	SNRPF	IPI00220528	0|2|0	2	0.67	0|0|0	0.49	6.67	0.51
KARS	SSR4	IPI00019385	2|0|0	2	0.67	0|0|0	0.49	6.67	0.51
KARS	PSMB5	IPI00479306	0|2|0	2	0.67	0|0|0	0.49	6.67	0.51
KARS	RPS26P11	IPI00187140	2|0|0	2	0.67	0|0|0	0.49	6.67	0.51
KARS	ATP5B	IPI00303476	2|0|0	2	0.67	0|0|0	0.49	6.67	0.51
KARS	RPL35A	IPI00029731	0|2|0	2	0.67	0|0|0	0.49	6.67	0.51
KARS	COG6	IPI01014154	2|0|0	2	0.67	0|0|0	0.49	6.67	0.51
KARS	FLH26326	IPI00442879	0|0|2	2	0.67	0|0|0	0.49	6.67	0.51
KARS	EIF4A1	IPI00025491	0|2|0	2	0.67	0|0|0	0.49	6.67	0.51
KARS	OSTCP1	IPI00183603	2|0|0	2	0.67	0|0|0	0.49	6.67	0.51
KARS	RPL38	IPI00215790	0|0|2	2	0.67	0|0|0	0.49	6.67	0.51
KARS	RPL34	IPI00219160	0|2|0	2	0.67	0|0|0	0.49	6.67	0.51
KARS	SNRPB2	IPI00029267	0|2|0	2	0.67	0|0|0	0.49	6.67	0.51
KARS	HIST1H2AE	IPI00026272	0|2|0	2	0.67	0|0|0	0.49	6.67	0.51
KARS	PTMA	IPI00455510	2|0|0	2	0.67	0|0|0	0.49	6.67	0.51
KARS	Putative	IPI00923578	0|2|0	2	0.67	0|0|0	0.49	6.67	0.51
KARS	RPL37A	IPI00414860	0|2|0	2	0.67	0|0|0	0.49	6.67	0.51
KARS	cDNA	IPI00922717	2|0|0	2	0.67	0|0|0	0.49	6.67	0.51
KARS	ACTR1A	IPI00029468	0|2|0	2	0.67	0|0|0	0.49	6.67	0.51
KARS	VH6DJ	IPI00827981	0|2|0	2	0.67	0|0|0	0.49	6.67	0.51
KARS	SLC25A10	IPI00015920	0|0|2	2	0.67	0|0|0	0.49	6.67	0.51
KARS	LACE1	IPI00893462	2|0|0	2	0.67	0|0|0	0.49	6.67	0.51
KARS	TMEM33	IPI00299084	0|2|0	2	0.67	0|0|0	0.49	6.67	0.51
KARS	GALNTL2	IPI00646314	2|0|0	2	0.67	0|0|0	0.49	6.67	0.51
KARS	DCD	IPI00027547	0|2|0	2	0.67	0|0|0	0.49	6.67	0.51
KARS	SNRPG	IPI00925525	0|2|0	2	0.67	0|0|0	0.49	6.67	0.51
KARS	MCOLN1	IPI00003750	0|0|2	2	0.67	0|0|0	0.49	6.67	0.51
KARS	MND1	IPI00029810	0|2|0	2	0.67	0|0|0	0.49	6.67	0.51
KARS	C7orf23	IPI00013331	0|0|2	2	0.67	0|0|0	0.49	6.67	0.51
KARS	H1FX	IPI00021924	0|2|0	2	0.67	0|0|0	0.49	6.67	0.51
KARS	CCDC127	IPI00060148	2|0|0	2	0.67	0|0|0	0.49	6.67	0.51
KARS	EXOSC4	IPI00745613	0|2|0	2	0.67	0|0|0	0.49	6.67	0.51
KARS	LOC339352	IPI00643550	0|2|0	2	0.67	0|0|0	0.49	6.67	0.51
KARS	CDKL1	IPI00023527	0|0|2	2	0.67	0|0|0	0.49	6.67	0.51
KARS	SCAMP3	IPI00306382	2|0|0	2	0.67	0|0|0	0.49	6.67	0.51
KARS	FLJ53959	IPI00916765	0|2|0	2	0.67	0|0|0	0.49	6.67	0.51
KARS	MAGED2	IPI00009542	0|2|0	2	0.67	0|0|0	0.49	6.67	0.51
KARS	RAD51B	IPI00006105	2|0|0	2	0.67	0|0|0	0.49	6.67	0.51
KARS	HNRPDL	IPI00011274	0|2|0	2	0.67	0|0|0	0.49	6.67	0.51
KARS	MIR1248	IPI00328328	0|2|0	2	0.67	0|0|0	0.49	6.67	0.51
KARS	TIGD6	IPI00550495	2|0|0	2	0.67	0|0|0	0.49	6.67	0.51
KARS	ACVR2B	IPI00437565	0|0|2	2	0.67	0|0|0	0.49	6.67	0.51
KARS	BMP5	IPI00024886	0|2|0	2	0.67	0|0|0	0.49	6.67	0.51
KARS	IPI00247659	IPI00247659	0|2|0	2	0.67	0|0|0	0.49	6.67	0.51
KARS	DDX21	IPI00015953	0|2|0	2	0.67	0|0|0	0.49	6.67	0.51
KARS	COPB1	IPI00295851	2|0|0	2	0.67	0|0|0	0.49	6.67	0.51
KARS	KIAA1147	IPI00401193	0|0|2	2	0.67	0|0|0	0.49	6.67	0.51
KARS	TIGD2	IPI00170549	0|0|2	2	0.67	0|0|0	0.49	6.67	0.51
KARS	PPP2R5D	IPI00000030	0|2|0	2	0.67	0|0|0	0.49	6.67	0.51
KARS	SLC2A12	IPI00152424	0|2|0	2	0.67	0|0|0	0.49	6.67	0.51
KARS	FAM190A	IPI00553113	2|0|0	2	0.67	0|0|0	0.49	6.67	0.51
KARS	NEFH	IPI00386758	2|0|0	2	0.67	0|0|0	0.49	6.67	0.51
KARS	LMNA	IPI00021405	2|0|0	2	0.67	0|0|0	0.49	6.67	0.51
KARS	PCDHB4	IPI00001429	0|0|2	2	0.67	0|0|0	0.49	6.67	0.51
KARS	FSD2	IPI00175833	2|0|0	2	0.67	0|0|0	0.49	6.67	0.51
KARS	LONRF3	IPI00300753	0|0|2	2	0.67	0|0|0	0.49	6.67	0.51
KARS	PFKP	IPI00009790	2|0|0	2	0.67	0|0|0	0.49	6.67	0.51
KARS	CCDC87	IPI00302151	0|2|0	2	0.67	0|0|0	0.49	6.67	0.51
KARS	ESPN	IPI00027820	2|0|0	2	0.67	0|0|0	0.49	6.67	0.51
KARS	SMEK1	IPI00217013	0|0|2	2	0.67	0|0|0	0.49	6.67	0.51
KARS	SUPT5H	IPI00298058	0|0|2	2	0.67	0|0|0	0.49	6.67	0.51
KARS	PKN2	IPI00002804	0|2|0	2	0.67	0|0|0	0.49	6.67	0.51
KARS	CCDC73	IPI00418774	0|0|2	2	0.67	0|0|0	0.49	6.67	0.51
KARS	DHX30	IPI00411733	0|2|0	2	0.67	0|0|0	0.49	6.67	0.51
KARS	JAK1	IPI00784013	2|0|0	2	0.67	0|0|0	0.49	6.67	0.51
KARS	CCDC150	IPI00783185	0|0|2	2	0.67	0|0|0	0.49	6.67	0.51
KARS	ARHGAP20	IPI00012622	0|2|0	2	0.67	0|0|0	0.49	6.67	0.51
KARS	RBM6	IPI00297723	0|0|2	2	0.67	0|0|0	0.49	6.67	0.51
KARS	NRXN3	IPI00216728	0|2|0	2	0.67	0|0|0	0.49	6.67	0.51
KARS	C3	IPI00783987	0|2|0	2	0.67	0|0|0	0.49	6.67	0.51
KARS	CDC42BPG	IPI00454910	0|2|0	2	0.67	0|0|0	0.49	6.67	0.51
KARS	DOCK1	IPI00015286	0|0|2	2	0.67	0|0|0	0.49	6.67	0.51
KARS	TLN2	IPI00219299	0|0|2	2	0.67	0|0|0	0.49	6.67	0.51
KARS	BAHCC1	IPI00845508	0|2|0	2	0.67	0|0|0	0.49	6.67	0.51
KARS	VCAN	IPI00009802	2|0|0	2	0.67	0|0|0	0.49	6.67	0.51
KARS	MUC16	IPI00103552	0|2|0	2	0.67	0|0|0	0.49	6.67	0.51
KARS	RPS4Y2	IPI00219894	6|11|6	23	7.67	0|3|6	0.48	2.56	0.52
KARS	ACTBL2	IPI00003269	0|5|3	8	2.67	0|0|5	0.48	1.6	0.52
KARS	RPS3	IPI00011253	8|11|16	35	11.67	3|6|8	0.47	2.06	0.53
KARS	RPL17	IPI00413324	3|10|3	16	5.33	0|2|5	0.47	2.29	0.53
KARS	ACTB	IPI00021439	5|8|8	21	7	0|4|5	0.45	2.33	0.55
KARS	FLJ27420	IPI00442381	0|0|4	4	1.33	0|0|2	0.45	2	0.55
KARS	RPL22	IPI00219153	5|7|4	16	5.33	0|2|5	0.44	2.29	0.56
KARS	RPL13	IPI00465361	4|14|8	26	8.67	0|4|8	0.43	2.17	0.57
KARS	RPLP0	IPI00008530	8|14|9	31	10.33	5|5|5	0.41	2.07	0.59
KARS	SNORD32A	IPI00304612	4|10|3	17	5.67	0|4|5	0.41	1.89	0.59
KARS	PSMD3	IPI00011603	0|0|5	5	1.67	0|0|4	0.4	1.25	0.6
KARS	POTEE	IPI00479743	0|5|0	5	1.67	0|0|4	0.4	1.25	0.6
KARS	PIP	IPI00022974	0|3|0	3	1	0|0|2	0.4	1.5	0.6
KARS	HNRNPA1	IPI00215965	0|3|0	3	1	0|2|0	0.4	1.5	0.6
KARS	CHERP	IPI00333010	0|0|3	3	1	2|0|0	0.4	1.5	0.6
KARS	JMJD1C	IPI00384202	0|3|0	3	1	0|0|2	0.4	1.5	0.6
KARS	RPS14	IPI00026271	5|7|6	18	6	2|3|3	0.39	2.25	0.61
KARS	RPL30	IPI00219156	2|7|4	13	4.33	0|4|3	0.38	1.86	0.62
KARS	TUBA8	IPI00646909	10|7|7	24	8	0|6|4	0.37	2.4	0.63
KARS	IPI00397701	IPI00397701	3|0|3	6	2	0|2|2	0.34	1.5	0.66
KARS	PDHA2	IPI00024087	0|0|4	4	1.33	0|0|4	0.34	1	0.66
KARS	RPL8	IPI00012772	8|8|8	24	8	3|4|3	0.33	2.4	0.67
KARS	DLST	IPI00033034	3|3|5	11	3.67	6|0|0	0.31	1.83	0.69
KARS	YWHAE	IPI00000816	0|0|2	2	0.67	0|0|2	0.31	1	0.69
KARS	YWHAZ	IPI00021263	0|2|0	2	0.67	0|0|2	0.31	1	0.69
KARS	RPL19	IPI00025329	2|0|0	2	0.67	0|0|2	0.31	1	0.69
KARS	DHX9	IPI00844578	0|2|0	2	0.67	0|0|2	0.31	1	0.69
KARS	FLG2	IPI00397801	0|0|2	2	0.67	0|0|2	0.31	1	0.69
KARS	AHSA1	IPI00030706	0|4|11	15	5	0|4|7	0.3	1.36	0.7
KARS	SF3B14	IPI00032827	0|4|3	7	2.33	0|2|3	0.27	1.4	0.73
KARS	RPS16	IPI00221092	12|11|14	37	12.33	2|7|7	0.25	2.31	0.75
KARS	CLTCL1	IPI00022881	0|0|3	3	1	0|4|0	0.24	0.75	0.76
KARS	SNORD73A	IPI00419880	18|20|22	60	20	2|11|10	0.22	2.61	0.78
KARS	EEF1A2	IPI00014424	10|6|0	16	5.33	0|4|7	0.22	1.45	0.78
KARS	RPS19	IPI00215780	0|4|2	6	2	0|2|3	0.22	1.2	0.78
KARS	PRDX1	IPI00000874	5|5|5	15	5	0|3|4	0.21	2.14	0.79
KARS	XRCC5	IPI00220834	0|2|0	2	0.67	0|0|3	0.21	0.67	0.79
KARS	SNRPD3	IPI00017964	2|3|3	8	2.67	0|3|2	0.15	1.6	0.85
KARS	EIF3L	IPI00465233	4|0|4	8	2.67	0|0|7	0.14	1.14	0.86
KARS	TUBB	IPI01019113	39|0|0	39	13	16|0|21	0.11	1.05	0.89
KARS	TUBB8	IPI00292496	16|7|16	39	13	0|9|10	0.1	2.05	0.9
KARS	PHF5A	IPI00005511	0|3|2	5	1.67	0|2|3	0.1	1	0.9
KARS	PHB	IPI00017334	2|5|4	11	3.67	0|3|5	0.06	1.38	0.94
KARS	DDX46	IPI00329791	0|3|0	3	1	0|6|0	0.06	0.5	0.94
KARS	DHX15	IPI00396435	0|0|2	2	0.67	0|2|2	0.05	0.5	0.95
KARS	TUBBP5	IPI00739915	9|0|10	19	6.33	0|5|9	0.04	1.36	0.96
KARS	HNRNPU	IPI00479217	4|2|2	8	2.67	0|3|4	0.04	1.14	0.96
KARS	TUBB3	IPI00013683	24|17|23	64	21.33	14|0|14	0.02	2.29	0.98
KARS	TUBA1C	IPI00218343	20|14|20	54	18	0|12|13	0.02	2.16	0.98
KARS	TUBA4A	IPI00007750	15|12|16	43	14.33	6|8|8	0.02	1.95	0.98
KARS	RPL18	IPI00215719	5|12|9	26	8.67	3|6|8	0.02	1.53	0.98
KARS	PRPF40A	IPI00337385	0|4|0	4	1.33	0|2|6	0.02	0.5	0.98
KARS	EEF1G	IPI00000875	3|4|6	13	4.33	0|3|8	0.01	1.18	0.99
KARS	DBT	IPI00003944	89|75|89	253	84.33	132|162|128	0	0.6	1
KARS	TUBB2C	IPI00007752	35|24|33	92	30.67	21|17|23	0	1.51	1
KARS	SF3A1	IPI00017451	7|32|46	85	28.33	15|38|60	0	0.75	1
KARS	CYFIP1	IPI00644231	23|36|23	82	27.33	30|54|57	0	0.58	1
KARS	TUBB2A	IPI00013475	31|19|29	79	26.33	13|14|17	0	1.8	1
KARS	NCKAP1	IPI00031982	7|37|29	73	24.33	25|39|39	0	0.71	1
KARS	HSPA8	IPI00003865	9|26|29	64	21.33	12|30|45	0	0.74	1
KARS	HSPA1B	IPI00304925	12|22|23	57	19	0|25|28	0	1.08	1
KARS	CKAP4	IPI00141318	0|27|25	52	17.33	3|39|60	0	0.51	1
KARS	CYFIP2	IPI00719600	14|18|16	48	16	24|36|40	0	0.48	1
KARS	TUBA3D	IPI00179709	16|13|14	43	14.33	9|9|10	0	1.54	1
KARS	HSPA2	IPI00007702	8|17|18	43	14.33	0|21|25	0	0.93	1
KARS	IPI01025580	IPI01025580	17|14|12	43	14.33	27|27|39	0	0.46	1
KARS	HSPA6	IPI00339269	8|16|16	40	13.33	7|18|20	0	0.89	1
KARS	RPS18	IPI00013296	9|14|12	35	11.67	2|9|11	0	1.59	1
KARS	SF3A3	IPI00029764	6|15|9	30	10	5|17|18	0	0.75	1
KARS	SF3B1	IPI00026089	0|20|7	27	9	2|20|14	0	0.75	1
KARS	PDHB	IPI00003925	5|9|9	23	7.67	8|8|10	0	0.88	1
KARS	PDHA1	IPI00306301	3|7|11	21	7	4|10|17	0	0.68	1
KARS	SF3A2	IPI00017341	5|4|11	20	6.67	3|5|9	0	1.18	1
KARS	HSPA1L	IPI00643152	0|0|19	19	6.33	9|20|19	0	0.4	1
KARS	HSPA5	IPI00003362	3|6|9	18	6	8|7|9	0	0.75	1
KARS	IPI00180956	IPI00180956	0|0|18	18	6	0|18|32	0	0.36	1
KARS	LOC728638	IPI00787323	9|0|9	18	6	0|12|17	0	0.62	1
KARS	BCKDHA	IPI00025100	5|4|8	17	5.67	10|6|10	0	0.65	1
KARS	DLAT	IPI00021338	2|7|7	16	5.33	3|5|9	0	0.94	1
KARS	PHB2	IPI00027252	2|5|7	14	4.67	0|5|8	0	1.08	1
KARS	CLTC	IPI00024067	0|8|5	13	4.33	3|12|20	0	0.37	1
KARS	SF3B3	IPI00300371	0|11|2	13	4.33	7|21|25	0	0.25	1
KARS	PCMT1	IPI00411680	0|6|6	12	4	0|4|12	0	0.75	1
KARS	IPI00844513	IPI00844513	0|0|8	8	2.67	0|4|14	0	0.44	1
KARS	GFAP	IPI00025363	0|0|7	7	2.33	0|0|14	0	0.5	1
KARS	DLD	IPI00015911	0|3|4	7	2.33	6|10|11	0	0.26	1
KARS	WASF2	IPI00472164	0|4|3	7	2.33	6|7|9	0	0.32	1
KARS	ATP5A1	IPI00440493	4|0|0	4	1.33	6|0|5	0	0.36	1
KARS	SF3B2	IPI00221106	0|4|0	4	1.33	3|12|9	0	0.17	1
KARS	ABI1	IPI00431025	0|0|3	3	1	3|4|5	0	0.25	1
KARS	RBM25	IPI00004273	0|0|2	2	0.67	0|2|5	0	0.29	1
KARS	HSP90AA1	IPI00382470	0|2|0	2	0.67	3|4|5	0	0.17	1
Spec1 ; the number of spectra in three replicates
SpecSum2 ; sum of spectra in three replicates
AvgSpec3 ; the average number of spectra in three replicates
ctrlCounts4 ; the number of spectra acquired in three replicates of Mock
SaintScore5 ; score acquired by SAINTexpress
FoldChange6
BFDR7
